# Supplementary material for: Expanding the scope of bis(catecholato)germane catalysis: hydrosilylation, hydroboration, Friedel–Crafts alkylation and oligomerization
Source: Royal Society of Chemistry journal article supplement (doi:10.1039/d3dt01945d), 2023-01-01
Supplement: d3dt01945d1.pdf [file d3dt01945d1.pdf]

## Supporting Information

for

### **Expanding the Scope of Bis(catecholato)germane Catalysis: Hydrosilylation, Hydroboration, Friedel-Crafts Alkylation and Oligomerization**

A. T. Henry, D. A. R. Nanan, K. M. Baines,

The Department of Chemistry, Western University, 1151 Richmond Street, London, Ontario,  
Canada

kbaines2@uwo.ca

#### Table of Contents

|                                      |     |
|--------------------------------------|-----|
| General Experimental .....           | S2  |
| General Catalytic Procedures.....    | S2  |
| Test for Hidden Boron Catalysis..... | S2  |
| Hammett Plot .....                   | S2  |
| Visual Kinetic Analysis .....        | S3  |
| Product Characterization.....        | S5  |
| Hydrosilylation of Aldehydes.....    | S5  |
| Oligomerization of Alkenes .....     | S6  |
| Hydroboration of Alkynes .....       | S7  |
| Friedel-Crafts Alkylation .....      | S8  |
| Computational Details .....          | S10 |
| NMR Spectra .....                    | S12 |
| Optimized Geometries .....           | S15 |
| References.....                      | S41 |

## General Experimental

All reactions were conducted under a nitrogen atmosphere using an MBraun Labmaster 130 glovebox. Solvents and reagents were purified by standard methods. NMR data were obtained on a 600 MHz INOVA, 400 MHz INOVA or a 400 MHz Bruker Avance III NMR spectrometer. The standards used were as follows: residual  $\text{CHCl}_3$  (7.26 ppm),  $\text{CH}_2\text{Cl}_2$  (5.32 ppm), toluene- $d_8$  (2.09 ppm) for  $^1\text{H}$  NMR spectra;  $\text{CDCl}_3$  (77.16 ppm) for  $^{13}\text{C}$  NMR spectra; J values are reported in Hertz.

## General Catalytic Procedures

A mixture containing the substrates (0.2 mmol of substrate at 1 eq.), catalyst (0.010 mmol for 5 mol%), mesitylene (0.022 mmol) as an internal standard, and, when specified, an additive (0.2 mmol for additives at 1 eq.), in 0.5 mL deuterated solvent ( $\text{CD}_2\text{Cl}_2$ ,  $\text{tol-}d_8$ ) were allowed to react for 24 hours in NMR tubes sealed with Parafilm<sup>®</sup> and electrical tape. Control experiments without catalyst were performed in parallel. Conversion of substrates to products was determined by integration against mesitylene ( $\text{C}_9\text{H}_{12}$ ) as an internal standard. Isolation of the Friedel-Crafts alkylation products was performed using preparative TLC (silica gel plates; 80:20 dichloromethane:hexanes).

## Test for Hidden Boron Catalysis

A mixture containing HBpin (0.2 mmol) and  $\text{Ge}(\text{cat}^{\text{Cl}})_2(\text{ACN})_2$  (0.02 mmol for 10 mol%) in 0.5 mL  $\text{tol-}d_8$ , and an additional reaction mixture containing HBpin, phenylacetylene and TMEDA (0.2 mmol) with  $\text{Ge}(\text{cat}^{\text{Cl}})_2(\text{ACN})_2$  (0.02 mmol for 10 mol%) in 0.5 mL  $\text{tol-}d_8$ , were allowed to react for 24 hours in NMR tubes sealed with Parafilm<sup>®</sup> and electrical tape. Both mixtures were analyzed using  $^{11}\text{B}$  NMR spectroscopy. No signal was observed which could reasonably be assigned to either  $\text{BH}_3$  or  $\text{BH}_3\text{-TMEDA}$ .

## Hammett Plot

A solution of styrene (0.1 mmol), substituted styrene (0.1 mmol), and mesitylene (0.022 mmol) dissolved in 0.5 mL of toluene- $d_8$  was added to solid  $\text{Ge}(\text{cat}^{\text{Cl}})_2(\text{ACN})_2$  (0.01 mmol) and the reaction was transferred to an NMR tube. The NMR tube was sealed with Parafilm<sup>®</sup> and electrical tape and heated to 100 °C for 30 minutes and then  $^1\text{H}$  NMR spectra were recorded at room temperature. The experiments were run in duplicate to  $\pm 5\%$  conversion. The integrations of

the signals assigned to one of the vinylic hydrogens of the styrene and the styrene derivatives were measured and converted to  $k_X/k_H$  values which were plotted against the Hammett parameter for each substituent.

#### Visual Kinetic Analysis

For each experiment, a suspension of  $\text{Ge}(\text{cat}^{\text{Cl}})_2(\text{ACN})_2$  (0.01 mmol) in 0.5 mL of  $\text{CD}_2\text{Cl}_2$  was transferred to an NMR tube with a Teflon cap. After lock and shimming, 0.25 mL of a solution containing  $\alpha$ -methylstyrene was added and a  $^1\text{H}$  NMR spectrum was taken every 1-2 minutes for 30 minutes. The total concentration of products formed (**3,4,5,6**) was monitored.

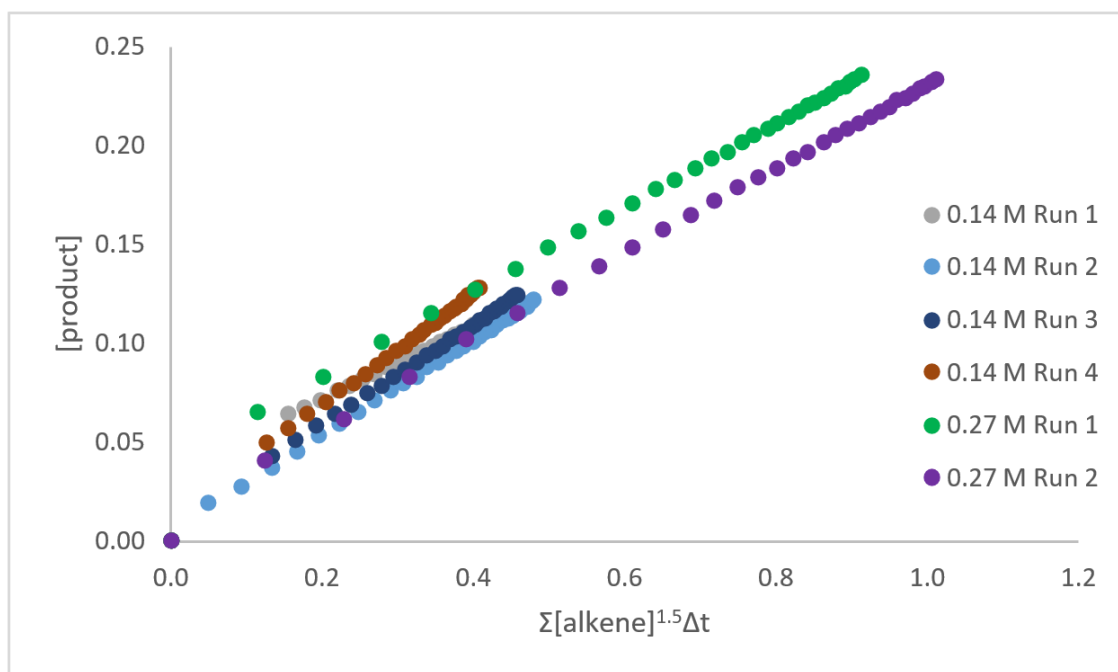

**Figure S1:** VTNA plot of 6 different runs at a reactant order of 1.5 for  $\alpha$ -methylstyrene.

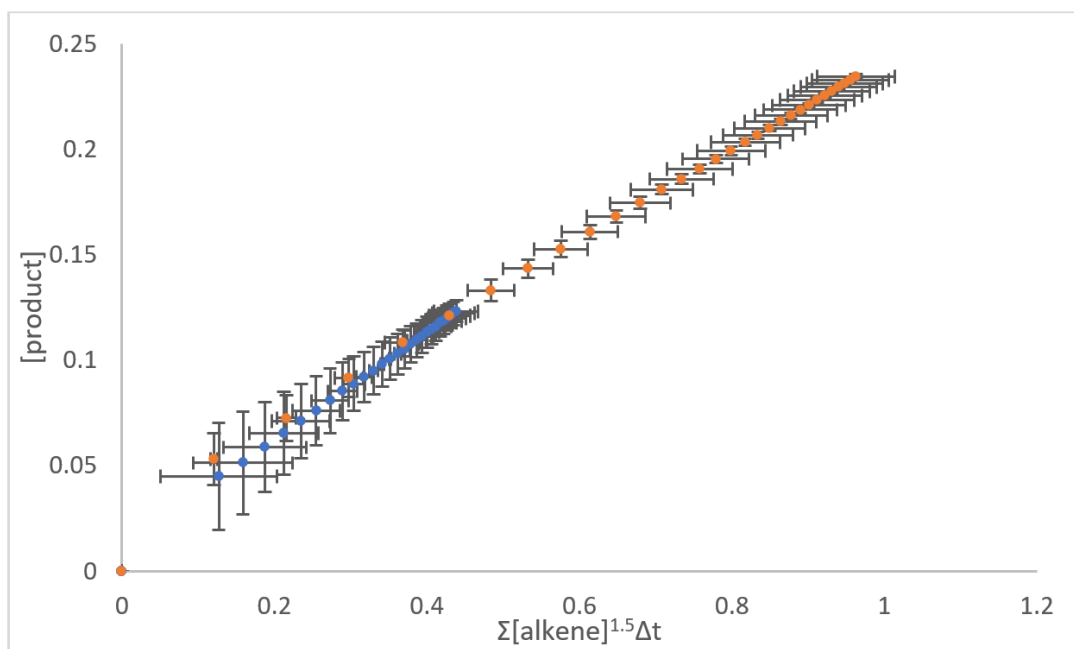

**Figure S2:** VTNA plot of two averaged runs at 0.14M and 0.27M at reactant order of 1.5 for  $\alpha$ -methylstyrene showing error bars.

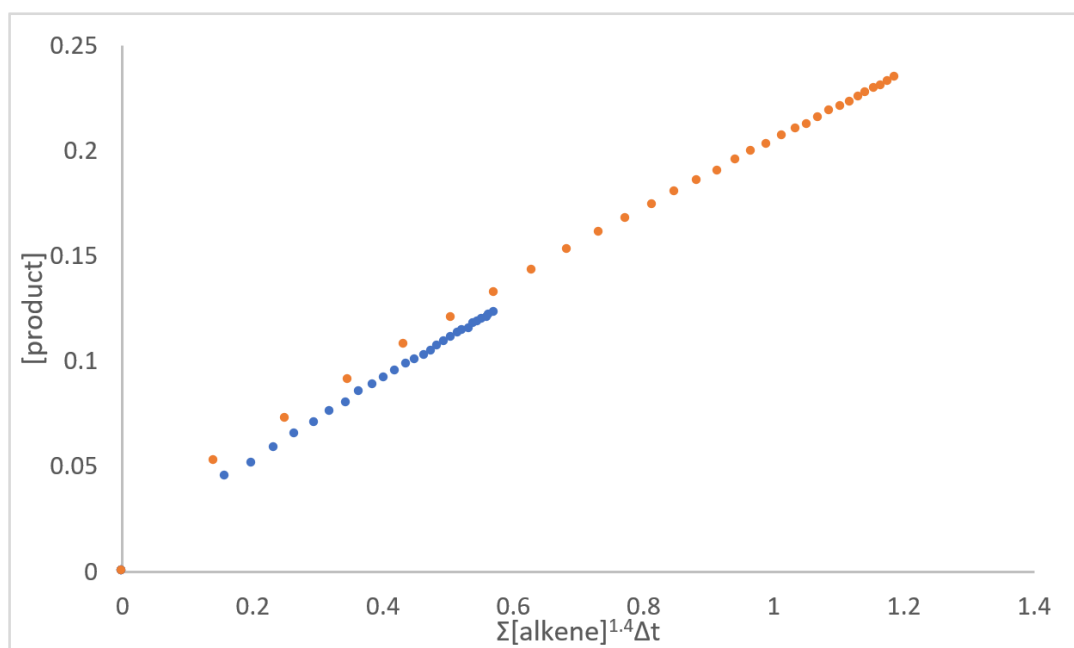

**Figure S3:** VTNA plot of two averaged runs at 0.14M and 0.27M at reactant order of 1.4 for  $\alpha$ -methylstyrene.

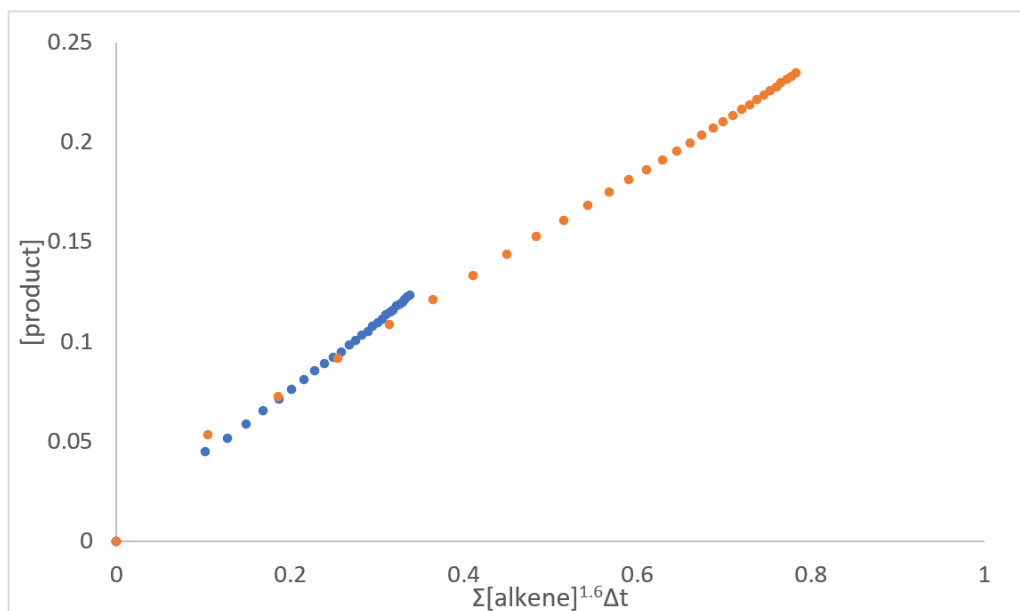

**Figure S4:** VTNA plot of two averaged runs at 0.14M and 0.27M at reactant order of 1.6 for  $\alpha$ -methylstyrene.

## Product Characterization

### Hydrosilylation of Aldehydes

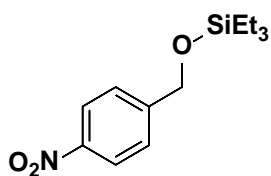

$^1\text{H NMR}$  (600 MHz,  $\text{CD}_2\text{Cl}_2$ ) 8.17 (d,  $J = 8.7$  Hz, 2H), 7.52 (d,  $J = 8.7$  Hz, 2H), 4.73 (s, 2H), 0.95 (t,  $J = 7.9$  Hz, 9H), 0.54 (q,  $J = 7.9$  Hz, 6H).<sup>1</sup>

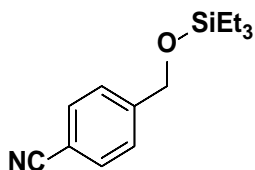

$^1\text{H NMR}$  (600 MHz,  $\text{CD}_2\text{Cl}_2$ )  $\delta$  7.67 (d,  $J = 8.3$  Hz, 2H), 7.50 (d,  $J = 8.0$  Hz, 2H), 4.66 (s, 2H), 0.95 (t,  $J = 8.0$  Hz, 9H), 0.55 (q,  $J = 8.0$  Hz, 6H).<sup>1</sup>

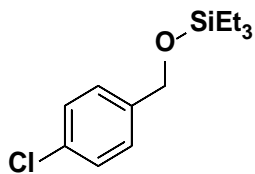

$^1\text{H NMR}$  (600 MHz,  $\text{CD}_2\text{Cl}_2$ )  $\delta$  7.50 (d,  $J = 8.4$  Hz, 2H), 7.25 (d,  $J = 8.4$  Hz, 2H), 4.50 (s, 2H), 0.96 (t,  $J = 7.9$  Hz, 9H), 0.56 (q,  $J = 8.0$  Hz, 6H).<sup>1</sup>

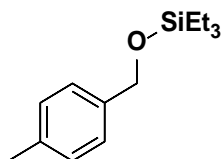

$^1\text{H NMR}$  (400 MHz,  $\text{CD}_2\text{Cl}_2$ )  $\delta$  7.26 (d,  $J = 7.8$  Hz, 2H), 7.18 (d,  $J = 7.7$  Hz, 2H), 4.51 (s, 2H), 2.36 (s, 3H), 0.98 (t,  $J = 7.9$  Hz, 9H), 0.57 (q,  $J = 7.9$  Hz, 6H).<sup>2</sup>

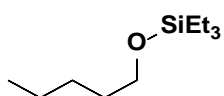

$^1\text{H NMR}$  (600 MHz,  $\text{CD}_2\text{Cl}_2$ )  $\delta$  3.39 (t,  $J = 6.8$  Hz, 2H), 1.55 (t,  $J = 7.1$  Hz, 2H), 1.40 – 1.28 (m, 4H), 0.96 (t,  $J = 7.9$  Hz, 9H), 0.91 (t,  $J = 7.0$  Hz, 3H), 0.55 (q,  $J = 7.9$  Hz, 6H).<sup>3</sup>

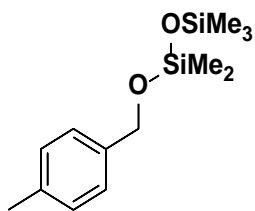

$^1\text{H NMR}$  (600 MHz  $\text{CD}_2\text{Cl}_2$ )  $\delta$  7.27 (d,  $J = 7.5$  Hz, 2H), 7.19 (d,  $J = 7.7$  Hz, 2H), 4.52 (s, 2H), 2.37 (s, 3H), 0.14 (d,  $J = 3.4$  Hz, 9H), 0.12 – 0.10 (m, 6H).<sup>4</sup>

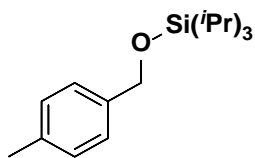

$^1\text{H NMR}$  (600 MHz,  $\text{CD}_2\text{Cl}_2$ )  $\delta$  7.29 (d,  $J = 8.0$  Hz, 2H), 7.22 (d,  $J = 7.6$  Hz, 2H), 4.84 (s, 2H), 2.37 (s, 3H), 1.1-1.2 (m).

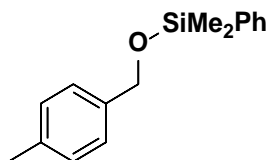

$^1\text{H NMR}$  (600 MHz,  $\text{CD}_2\text{Cl}_2$ )  $\delta$  7.67-7.40 (5H), 7.31 (d,  $J = 7.6$  Hz, 2H), 7.18 (d,  $J = 8.0$  Hz, 2H), 4.55 (s, 2H), 2.40 (s, 3H), 0.68 (s, 3H).<sup>3</sup>

#### Oligomerization of Alkenes

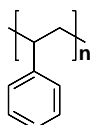

$^1\text{H NMR}$  (400 MHz,  $\text{CD}_2\text{Cl}_2$ ):  $\delta$  7.20-7.00 (br s, 3H), 6.65-6.45 (br s, 2H), 1.84 (br s, 1H), 1.47 (br s, 2H).<sup>5</sup>

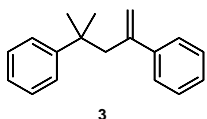

$^1\text{H NMR}$  (400 MHz, Toluene- $d_8$ ):  $\delta$  7.00-7.30 (m, 10H), 5.10 (s, 1H), 4.74 (s, 1H), 2.71 (s, 2H), 1.15 (s, 6H).<sup>6</sup>

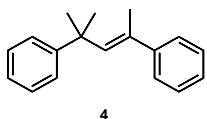

$^1\text{H NMR}$  (400 MHz, Toluene- $d_8$ ):  $\delta$  7.00-7.30 (m, 10H), 6.09 (s, 1H), 1.53 (s, 3H).<sup>7</sup>

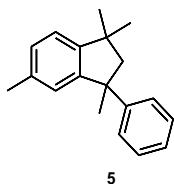

$^1\text{H NMR}$  (400 MHz, Toluene- $d_8$ ):  $\delta$  7.00-7.30 (m, 9H), 2.33 (d, 1H), 2.05 (d, 1H), 1.58 (s, 3H), 1.24 (s, 3H), 1.00 (s, 3H).<sup>6</sup>

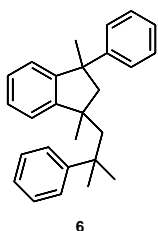

$^1\text{H NMR}$  (600 MHz, Toluene- $d_8$ ):  $\delta$  7.20 – 7.50 (m, 15 H), 2.59 (d,  $J = 15$  Hz, 1 H), 2.20 (d,  $J = 14$  Hz, 1H), 1.90 (d,  $J = 15$  Hz, 1H), 1.72 (d,  $J = 14$  Hz, 1H), 1.60 (s, 3H), 1.28 (s, 3H), 1.15 (s, 3H), 0.96 (s, 3H).<sup>8</sup>

### Hydroboration of Alkynes

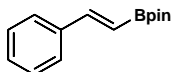

$^1\text{H NMR}$  (400 MHz, Toluene- $d_8$ ):  $\delta$  7.60 (d,  $J = 18.5$  Hz, 1 H), 7.27 (d, 2 H), 7.09 – 7.01 (m, 3 H), 6.32 (d,  $J = 18.5$  Hz, 1 H), 1.12 (s, 12 H).  $^{11}\text{B NMR}$  (128 MHz, Toluene- $d_8$ ): 30.79 (d).<sup>9</sup>

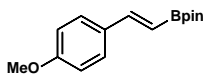

$^1\text{H NMR}$  (400 MHz, Toluene- $d_8$ ):  $\delta$  7.60 (d,  $J = 18.2$  Hz, 1 H), 7.23 (d, 2 H), 6.60 (m, 2 H), 6.20 (d,  $J = 18.3$  Hz, 1 H), 3.28 (s, 3H), 1.14 (s, 12 H).<sup>10</sup>

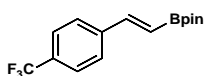

$^1\text{H NMR}$  (400 MHz, Toluene- $d_8$ ):  $\delta$  7.46 (d,  $J = 18.4$  Hz, 1 H), 7.20 (d,  $J = 8.1$  Hz, 2 H), 7.03 (d,  $J = 8.1$  Hz, 2 H), 6.28 (d,  $J = 18.4$  Hz, 1 H), 1.12 (s, 12 H)  $^{11}\text{B NMR}$  (128 MHz, Toluene- $d_8$ ): 30.05 (d).<sup>10</sup>

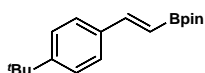

$^1\text{H NMR}$  (400 MHz, Toluene- $d_8$ ):  $\delta$  7.65 (d,  $J = 18.5$  Hz, 1 H), 7.29 (d, 2 H), 6.60 (d, 2 H), 6.20 (d,  $J = 18.5$  Hz, 1 H), 1.20 (s, 9 H), 1.14 (s, 12 H).<sup>10</sup>

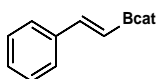

$^1\text{H}$  NMR (400 MHz, Toluene- $d_8$ ):  $\delta$  7.72 (d,  $J$  = 18.5 Hz, 1 H), 7.27 – 7.24 (m, 2 H), 7.07 – 7.04 (m, 4 H), 6.84 – 6.81 (m, 2H), 6.38 (d,  $J$  = 18.5 Hz, 1 H).  $^{11}\text{B}$  NMR (128 MHz, Toluene- $d_8$ ): 31.91 (d).<sup>11</sup>

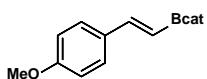

$^1\text{H}$  NMR (400 MHz, Toluene- $d_8$ ):  $\delta$  7.75 (d,  $J$  = 18.5 Hz, 1 H), 7.23 (d, 2 H), 7.08 – 7.06 (d, 2 H), 6.85 – 6.82 (m, 2 H), 6.63 (m, 2H), 6.28 (d,  $J$  = 18.5 Hz, 1 H).  $^{11}\text{B}$  NMR (128 MHz, Toluene- $d_8$ ): 32.16 (d).<sup>12</sup>

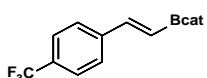

$^1\text{H}$  NMR (400 MHz, Toluene- $d_8$ ):  $\delta$  7.52 (d,  $J$  = 18.8 Hz, 1 H), 7.25 (m, 2 H), 7.07 – 7.02 (m, 4 H), 6.84 (d, 2 H), 6.28 (d,  $J$  = 18.8 Hz, 1 H).  $^{11}\text{B}$  NMR (128 MHz, Toluene- $d_8$ ): 31.93 (d).<sup>13</sup>

### Friedel-Crafts Alkylation

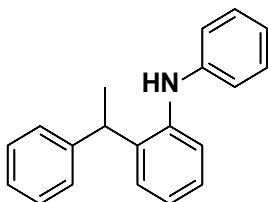

$^1\text{H}$  NMR (400 MHz, Toluene- $d_8$ )  $\delta$  7.16 – 7.11 (m, 2H), 7.10 – 7.03 (m, 4H), 6.83 – 6.78 (m, 8H), 4.94 (s, 1H), 3.92 (q,  $J$  = 7.2 Hz, 1H), 1.50 (d,  $J$  = 7.2 Hz, 3H).<sup>14</sup>

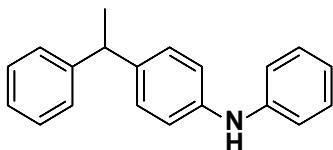

$^1\text{H}$  NMR (400 MHz, Toluene- $d_8$ )  $\delta$  7.33 – 6.85 (m, 13H), 6.67 – 6.57 (m, 2H), 5.02 (s, 1H), 4.05 (q,  $J$  = 7.1 Hz, 1H), 1.42 (d,  $J$  = 7.2 Hz, 3H).<sup>14</sup>

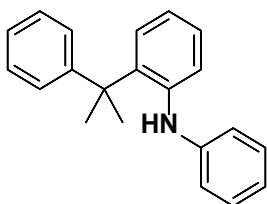

$^1\text{H}$  NMR (400 MHz, Toluene- $d_8$ )  $\delta$  7.23 – 7.20 (m, 2H), 7.16 – 7.12 (m, 2H), 7.08 – 7.04 (5H), 6.82 – 6.75 (2H), 1.57 (s, 6H).<sup>15</sup>

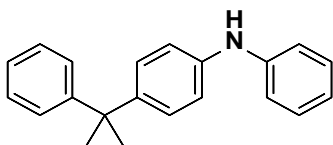

$^1\text{H}$  NMR (400 MHz, Toluene- $d_8$ )  $\delta$  7.24 – 7.19 (m, 1H), 7.14 (dd,  $J$  = 8.5, 6.8 Hz, 1H), 7.09 – 7.03 (m, 5H), 6.83 – 6.74 (m, 7H), 1.56 (s, 6H).<sup>15</sup>



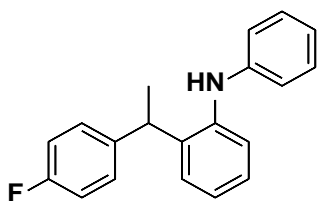

$^1\text{H NMR}$  (400 MHz, Toluene- $d_8$ )  $\delta$  7.15-6.70 (18 H), 4.02 (q,  $J = 7.2$  Hz, 1H), 1.44 (d,  $J = 7.2$  Hz, 3H).<sup>15</sup>

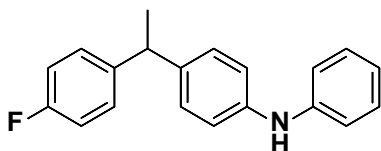

$^1\text{H NMR}$  (400 MHz, Toluene- $d_8$ )  $\delta$  7.15-6.70 (18 H), 4.83 (q,  $J = 7.2$  Hz, 1H), 1.44 (d,  $J = 7.2$  Hz, 3H).<sup>15</sup>

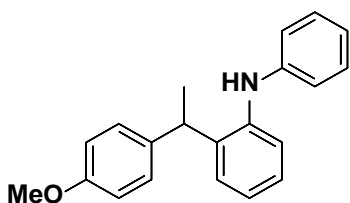

$^1\text{H NMR}$  (400 MHz, Toluene- $d_8$ )  $\delta$  7.13-6.67 (18 H), 3.94 (q,  $J = 7.3$  Hz, 1H), 1.56 (d,  $J = 7.3$  Hz, 3H).<sup>15</sup>

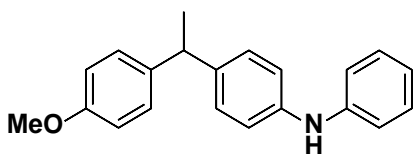

$^1\text{H NMR}$  (400 MHz, Toluene- $d_8$ )  $\delta$  7.13-6.67 (18 H), 4.09 (m, 1H), 1.55 (d,  $J = 7.2$  Hz, 3H).<sup>15</sup>

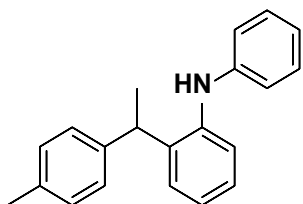

$^1\text{H NMR}$  (400 MHz, Toluene- $d_8$ )  $\delta$  7.32-7.24 (2 H), 7.07-7.05 (m, 2H), 6.95-6.93 (3H), 6.90-6.84 (m, 4H), 6.75-6.64 (3H), 4.05 (q,  $J = 6.8$  Hz, 1H), 2.09 (s, 3H), 1.44 (d,  $J = 6.8$  Hz, 3H).<sup>15</sup>

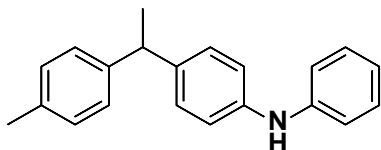

$^1\text{H NMR}$  (400 MHz, Toluene- $d_8$ )  $\delta$  7.32-6.68 (13 H), 3.93 (q,  $J = 7.2$  Hz, 1H), 2.14 (s, 3H), 1.53 (d,  $J = 6.8$  Hz, 3H).<sup>15</sup>

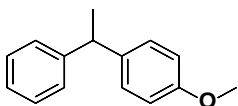

$^1\text{H NMR}$  (400 MHz, Toluene- $d_8$ )  $\delta$  7.27-6.69 (9 H), 3.36 (q,  $J = 7.3$  Hz, 1H), 1.52 (d,  $J = 7.3$  Hz, 3H).<sup>16</sup>

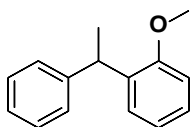

$^1\text{H NMR}$  (400 MHz, Toluene- $d_8$ )  $\delta$  7.27-6.69 (9 H), 3.95 (q,  $J = 7.3$  Hz, 1H), 1.57 (d,  $J = 7.2$  Hz, 3H).<sup>16</sup>

### Computational Details

All calculations have been performed with ORCA 4.1.2 and ORCA 4.2. Geometry optimizations were performed with PBEh-3c/def2-mSVP as implemented in ORCA, using grid5 settings. All calculated geometries have been confirmed as energetic minima on the potential energy surface by analytical calculation of harmonic frequencies at the PBEh-3c level. In case of negative frequencies  $>10\text{ cm}^{-1}$ , the geometries were reoptimized with grid6, TightOPT and VeryTightSCF settings. For the fluoride ion affinities, the optimized geometries were then used to calculate the single point energies at B3LYP D3(BJ)/def2-TZVPP level of theory using the RIJCOSX approximation and def2/J as the auxiliary basis set. For the reaction coordinate calculations, the optimized geometries were used to calculate the thermodynamic values at BP86 D3(BJ)/def2-SVP level of theory using the RIJCOSX approximation and def2/J as the auxiliary basis set.

Calculated energetics of ligand dissociation and substrate activation with  $\text{Ge}(\text{cat}^{\text{Br}})_2$ .

| Complex                                             | Enthalpy (hartree) | Enthalpy (kJ/mol) | Gibbs (hartree) | Gibbs (kJ/mol) |
|-----------------------------------------------------|--------------------|-------------------|-----------------|----------------|
| $\text{Ge}(\text{cat}^{\text{Br}})_2(\text{ACN})_2$ | -23692.90088       | -62205711.27      | -23692.99072    | -62205947.13   |
| $\text{Ge}(\text{cat}^{\text{Br}})_2(\text{ACN})$   | -23560.25869       | -61857459.2       | -23560.34328    | -61857681.27   |
| $\text{Ge}(\text{cat}^{\text{Br}})_2(\text{THF})_2$ | -23892.05995       | -62728603.39      | -23892.15298    | -62728847.65   |
| $\text{Ge}(\text{cat}^{\text{Br}})_2(\text{THF})$   | -23659.83407       | -62118894.35      | -23659.92072    | -62119121.85   |
| $\text{Ge}(\text{cat}^{\text{Br}})_2$               | -23427.62475       | -61509228.78      | -23427.70542    | -61509440.58   |
| ACN                                                 | -132.6064582       | -348158.2559      | -132.6361785    | -348236.2865   |
| THF                                                 | -232.1676769       | -609556.2356      | -232.1991325    | -609638.8223   |
| Styrene                                             | -309.302937        | -812074.8612      | -309.3421922    | -812177.9256   |

|                                                                                          |              |              |              |              |
|------------------------------------------------------------------------------------------|--------------|--------------|--------------|--------------|
| Ge(cat <sup>Br</sup> ) <sub>2</sub> (Styrene)                                            | -23736.96198 | -62321393.68 | -23737.0548  | -62321637.37 |
| <i>Cis</i> -<br>Ge(cat <sup>Br</sup> ) <sub>2</sub> (Styrene)(ACN)                       | -23869.59659 | -62669625.85 | -23869.69422 | -62669882.18 |
| <i>Trans</i> -<br>Ge(cat <sup>Br</sup> ) <sub>2</sub> (Styrene)(ACN)                     | -23869.60727 | -62669653.89 | -23869.70222 | -62669903.19 |
| Phenylacetylene                                                                          | -308.0730972 | -808845.9166 | -308.1092989 | -808940.9643 |
| <i>Trans</i> -<br>Ge(cat <sup>Br</sup> ) <sub>2</sub> (PhCCH)(ACN)                       | -23868.37636 | -62666422.13 | -23868.4692  | -62666665.87 |
| <i>Para</i> -tolualdehyde                                                                | -384.4930966 | -1009486.625 | -384.5336354 | -1009593.06  |
| <i>Trans</i> -Ge(cat <sup>Br</sup> ) <sub>2</sub> ( <i>para</i> -<br>tolualdehyde)(ACN)  | -23812.15959 | -62518825.01 | -23812.24953 | -62519061.14 |
| HSiEt <sub>3</sub>                                                                       | -527.3560081 | -1384573.199 | -527.3986291 | -1384685.101 |
| SiEt <sub>3</sub> <sup>+</sup>                                                           | -526.494541  | -1382311.417 | -526.5342082 | -1382415.564 |
| ACN--SiEt <sub>3</sub> <sup>+</sup>                                                      | -659.1825821 | -1730683.869 | -659.2302814 | -1730809.104 |
| Ge(cat <sup>Br</sup> ) <sub>2</sub> H <sup>-</sup>                                       | -23428.35791 | -61511153.7  | -23428.43766 | -61511363.07 |
| Ge(cat <sup>Br</sup> ) <sub>2</sub> (ACN)H <sup>-</sup>                                  | -23560.9817  | -61859357.45 | -23561.06848 | -61859585.28 |
| Ge(cat <sup>Br</sup> ) <sub>2</sub> (H)(SiEt <sub>3</sub> )                              | -23955.0062  | -62893868.79 | -23955.1002  | -62894115.58 |
| 4-methylacetophenone                                                                     | -423.7597565 | -1112581.241 | -423.7999731 | -1112686.829 |
| <i>Trans</i> -Ge(cat <sup>Br</sup> ) <sub>2</sub> (Me-Ph-<br>(C=O)CH <sub>3</sub> )(ACN) | -23984.07199 | -62970181.02 | -23984.1691  | -62970435.96 |
| HBpin                                                                                    | -411.3904697 | -1080105.678 | -411.4302557 | -1080210.136 |
| <i>Trans</i> -<br>Ge(cat <sup>Br</sup> ) <sub>2</sub> (HBpin)(ACN)                       | -23971.69996 | -62937698.25 | -23971.79894 | -62937958.12 |

## NMR Spectra

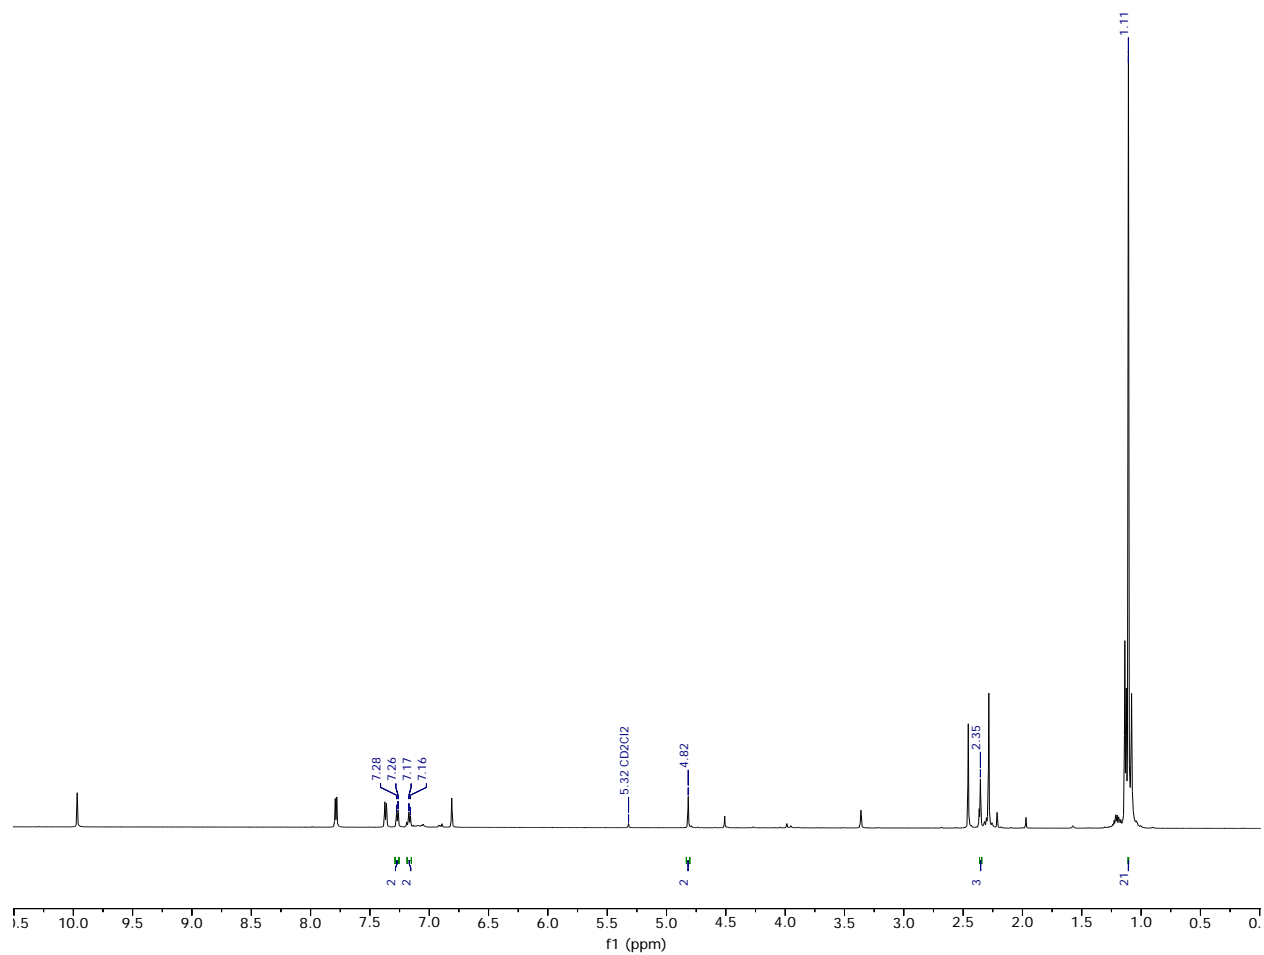

**Figure S.5:** <sup>1</sup>H NMR (Tol-*d*<sub>8</sub>, 400 MHz) spectrum of the hydrosilylation of *para*-tolualdehyde with HSi(*i*Pr)<sub>3</sub> (Scheme 1, Entry 10).

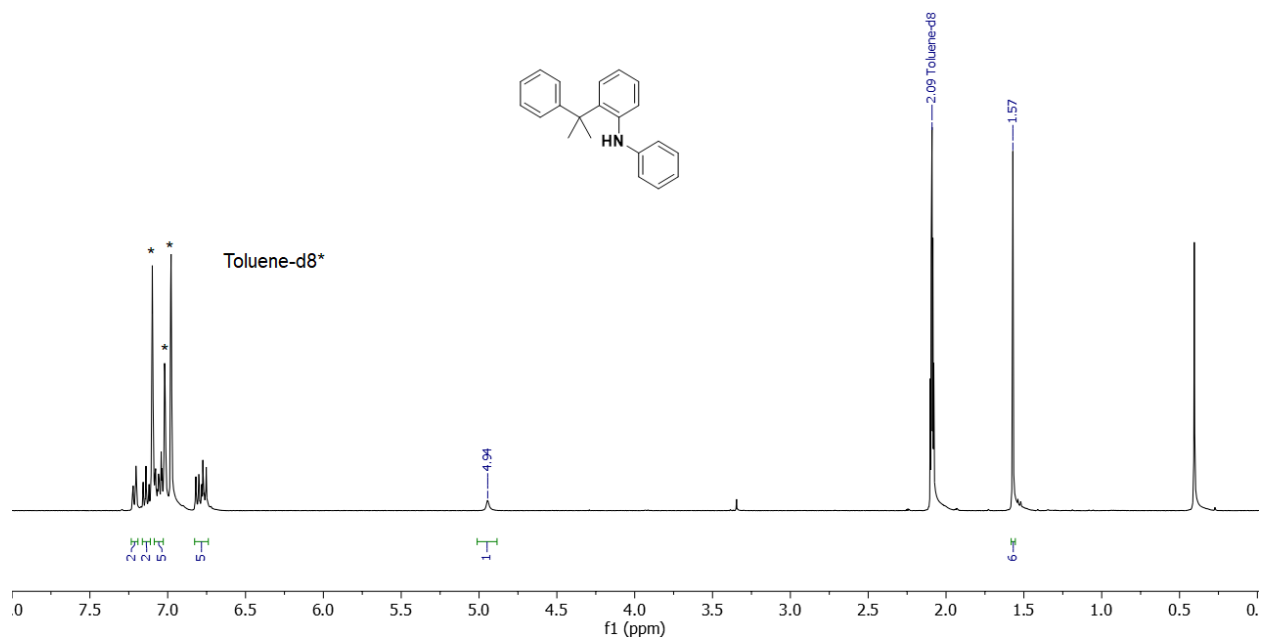

**Figure S.6:**  $^1\text{H}$  NMR ( $\text{Tol-d}_8$ , 400 MHz) spectrum of the isolated *ortho* Friedel-Crafts alkylation product of  $\text{HNPh}_2$  and  $\alpha$ -methylstyrene (Table 6, Entries 5-8).



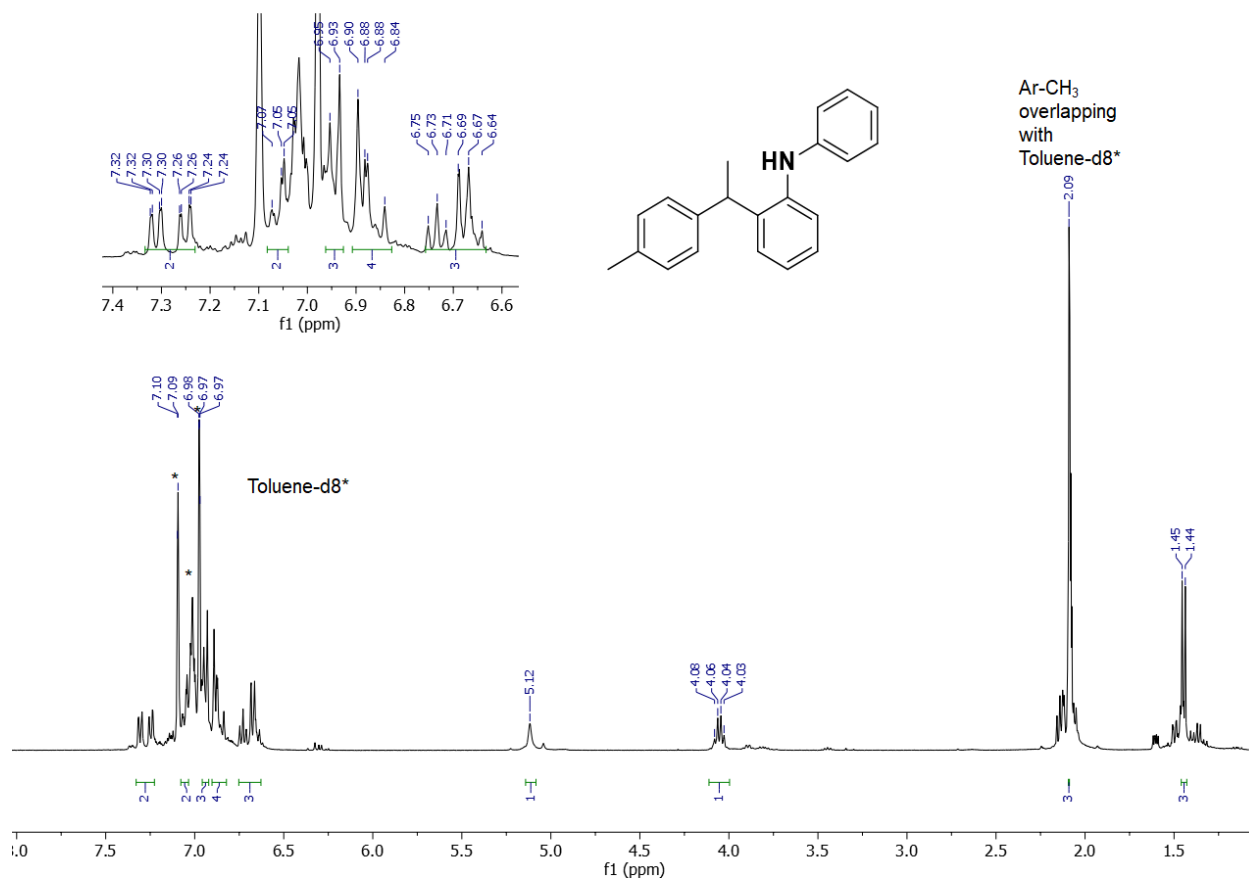

**Figure S.8:**  $^1\text{H}$  NMR (Tol- $d_8$ , 400 MHz) spectrum of the isolated *ortho* Friedel-Crafts alkylation product of  $\text{HNPh}_2$  and 4-methylstyrene (Table 8, Entry 5).

### Optimized Geometries

$\text{Ge}(\text{cat}^{\text{Br}})_2(\text{ACN})_2$

|    |                   |                   |                   |
|----|-------------------|-------------------|-------------------|
| Br | 6.31150273503780  | -0.53587316974055 | 1.63474070361356  |
| Br | -6.42930051233438 | 2.28859126302645  | 1.67631340197940  |
| Br | -3.60579223484346 | 1.63258283556596  | -3.24453254153491 |
| Br | 3.44407791252394  | 0.06661078084264  | -3.26755441084641 |
| Br | 6.29531766018062  | -0.55178585788025 | -1.66295071554108 |
| Br | 3.47578827799620  | 0.09692337291641  | 3.26114999580770  |
| Br | -3.58050748216137 | 1.66704578732665  | 3.28413248553203  |
| Br | -6.44221273176974 | 2.27029670023268  | -1.62138588354555 |
| Ge | -0.06692592356721 | 0.86448398366022  | 0.01068446112139  |

|   |                   |                   |                   |
|---|-------------------|-------------------|-------------------|
| O | -1.33738215725605 | 1.15776216800694  | 1.28643318021577  |
| O | -1.34684919017487 | 1.14579626114868  | -1.25877806899504 |
| O | 1.20227160746859  | 0.57185549674446  | -1.26702693181216 |
| O | 1.21445541762039  | 0.58266284967723  | 1.27810040655014  |
| N | 0.39892965455382  | 2.92859601003800  | 0.00372430396217  |
| N | -0.53108034617178 | -1.20048175647015 | 0.02107806596674  |
| C | -0.78104720238023 | -2.31406838775072 | 0.02236895839471  |
| C | -1.09394666566559 | -3.72386769249904 | 0.02537614472660  |
| C | 0.65455229238416  | 4.04077959175377  | 0.02030837271265  |
| C | 0.97967940934020  | 5.44756759456604  | 0.03829265586869  |
| C | -2.51195805966487 | 1.41518117821872  | 0.71803968931698  |
| C | -2.51711132504529 | 1.40841553425448  | -0.68438522458824 |
| C | 2.38451494885086  | 0.32175749212255  | 0.70208272601235  |
| C | 2.37770216056843  | 0.31584170145225  | -0.70036973106033 |
| C | -3.68470241179963 | 1.66192656355043  | -1.37846461710231 |
| C | -4.86631570448186 | 1.92782107182589  | -0.67337488441928 |
| C | -4.86094636391168 | 1.93534382793130  | 0.71981499966422  |
| C | -3.67391576438638 | 1.67668838733039  | 1.41846961800960  |
| C | 3.53936361676225  | 0.05609841444022  | -1.40203604987513 |
| C | 4.72740077101182  | -0.20145409675337 | -0.70465994086429 |
| C | 4.73422249572154  | -0.19486841233847 | 0.68850890071009  |
| C | 3.55294039651267  | 0.06909359029621  | 1.39492737313571  |
| H | -0.94182035823955 | -4.13201008264009 | 1.02260538013569  |
| H | -2.13181140070209 | -3.87067003720333 | -0.26730043529123 |
| H | -0.44683856539125 | -4.24466188205608 | -0.67791600276316 |
| H | 0.86182675015074  | 5.86551625329633  | -0.95962400187025 |
| H | 0.31678361380833  | 5.96939349496134  | 0.72596046463189  |
| H | 2.00952977585491  | 5.58238892924578  | 0.36352439784130  |

**Ge(cat<sup>Br</sup>)<sub>2</sub>(ACN)**

|    |                   |                   |                   |
|----|-------------------|-------------------|-------------------|
| Br | 6.29511738310464  | -0.38475421316056 | 1.57307418194276  |
| Br | -6.15919345643302 | 3.01439339699170  | 1.65030379288598  |
| Br | -3.87437846212390 | 0.89064993351554  | -3.13396528215532 |
| Br | 3.43184536816781  | 1.12747414339038  | -3.12965544506298 |



|    |                   |                   |                   |
|----|-------------------|-------------------|-------------------|
| Br | 6.32343777330576  | 0.49794196193726  | -1.60200247597609 |
| Br | 3.37887793380295  | -0.61436325572981 | 3.16381022318387  |
| Br | -3.24925416135689 | 2.46313997498051  | 3.17319059986748  |
| Br | -6.47511397276012 | 2.21570755731963  | -1.53133678828371 |
| Ge | -0.18655540683728 | 0.43667143030626  | 0.01523101812990  |
| O  | -1.25559174923376 | 1.23195282482015  | 1.21189760381981  |
| O  | -1.48957012309002 | 0.65254956134392  | -1.23406439798570 |
| O  | 1.11089042396098  | 0.74913025468283  | -1.17840473502840 |
| O  | 1.09357956494182  | 0.10197551146734  | 1.26110348392070  |
| N  | -0.61722512093006 | -1.55058097034415 | 0.01741384473848  |
| C  | -0.88090509936098 | -2.66110445545480 | 0.02663725937606  |
| C  | -1.21434811359090 | -4.06382576726293 | 0.03696644882885  |
| C  | -2.45670060241874 | 1.50170403413050  | 0.67499658280794  |
| C  | -2.58405239539399 | 1.16872268949130  | -0.67441556072161 |
| C  | 2.30474056442660  | 0.15778024839576  | 0.70582091933002  |
| C  | 2.32093731930449  | 0.52564709638662  | -0.64020450659871 |
| C  | -3.78006623343984 | 1.37544722997588  | -1.33475557975639 |
| C  | -4.85867328343445 | 1.93259162634189  | -0.63719732736004 |
| C  | -4.72582449514218 | 2.27052929053558  | 0.71022014585378  |
| C  | -3.51209397196120 | 2.05004631114159  | 1.37400766117723  |
| C  | 3.50836259060954  | 0.62956633033255  | -1.33455831399524 |
| C  | 4.71064390877408  | 0.35827436333791  | -0.66870827879173 |
| C  | 4.69795544812010  | -0.01515313815410 | 0.67579902263025  |
| C  | 3.48537710814969  | -0.11778184010599 | 1.36848302311080  |
| H  | -2.06789008787029 | -4.22872961100463 | 0.69250576269963  |
| H  | -1.46966496442917 | -4.38699646938139 | -0.97078027477992 |
| H  | -0.36553065396166 | -4.64110208572671 | 0.39921405999228  |

**Ge(cat<sup>Br</sup>)<sub>2</sub>(THF)<sub>2</sub>**

|    |                   |                   |                   |
|----|-------------------|-------------------|-------------------|
| Ge | -0.20821754356115 | 0.50400013170913  | -0.03909823892905 |
| Br | -6.32654951633587 | 3.07579055332561  | -1.10157452658003 |
| Br | -3.38022060765570 | 1.46510622097027  | 3.51988648526183  |
| Br | 3.56040927611157  | -0.06176027916304 | 2.98159570132042  |
| Br | 6.20587933368051  | 0.46576381023926  | -2.05337936216315 |

|    |                   |                   |                   |
|----|-------------------|-------------------|-------------------|
| Br | 3.21008390717653  | 0.66667828540083  | -3.49602440897135 |
| Br | -3.76016887530704 | 2.06373238080083  | -2.96967816612832 |
| Br | -6.13361881135119 | 2.77448216166263  | 2.17743340326907  |
| Br | 6.38337359999966  | 0.09624882394158  | 1.21932978936767  |
| O  | -0.62844624968019 | -1.47208941054212 | -0.21792110875012 |
| O  | 0.22123538046936  | 2.52456131838958  | 0.14451913483851  |
| O  | 1.15360197530836  | 0.13814006547199  | 1.12828706583649  |
| O  | 1.01696075787126  | 0.40995827898671  | -1.39967833957440 |
| O  | -1.55965777410428 | 0.92471692385670  | -1.20076982490318 |
| O  | -1.41657921264066 | 0.68038368565139  | 1.32904010478176  |
| C  | 0.36558782586408  | -2.52577625655380 | -0.15532720559639 |
| C  | -0.37536356436694 | -3.75943197492937 | -0.63225417418941 |
| C  | -1.80270988942835 | -3.49311160522438 | -0.16738184627275 |
| C  | -1.96153195875193 | -2.00632460513852 | -0.41668658207444 |
| C  | 0.19957547189099  | 3.46521270761220  | -0.95776514814759 |
| C  | 0.56968728441768  | 3.17225847178570  | 1.39353070148845  |
| C  | 0.47611287328436  | 4.65205689212570  | 1.07665693536300  |
| C  | 0.87302012055159  | 4.70126603540639  | -0.39519930112122 |
| C  | 3.55154780548433  | 0.12942873646192  | 1.12316125596425  |
| C  | 4.72545401280217  | 0.20381845498227  | 0.36147029049522  |
| C  | 4.65022193451793  | 0.35921400059441  | -1.02154069852645 |
| C  | 3.40123190085872  | 0.44004653921731  | -1.65158319200973 |
| C  | -3.58092627137196 | 1.65345030878482  | 1.67204390300695  |
| C  | -4.72614761315153 | 2.20769132624551  | 1.08473394355847  |
| C  | -4.80760668052717 | 2.33560127642842  | -0.30084435780083 |
| C  | -3.74342309101180 | 1.91082587433584  | -1.10772551103602 |
| C  | 2.24679129485881  | 0.35371876210996  | -0.89663891283955 |
| C  | 2.32304340262394  | 0.20016858218018  | 0.49507124334953  |
| C  | -2.62211937278828 | 1.35422063505355  | -0.52334816949187 |
| C  | -2.54078522065213 | 1.22285904508352  | 0.87040939353145  |
| H  | 0.04895866424303  | -4.66993421156603 | -0.21173544268130 |
| H  | -0.33140814307391 | -3.84016597920158 | -1.71974278901942 |
| H  | 1.20656042061103  | -2.25523605096369 | -0.79125191194997 |

|   |                   |                   |                   |
|---|-------------------|-------------------|-------------------|
| H | 0.70654435589368  | -2.61625856864669 | 0.87634365328329  |
| H | -1.91253419843229 | -3.72055144547042 | 0.89437045852163  |
| H | -2.54575268829635 | -4.07319170926812 | -0.71262077189638 |
| H | -2.64290777602519 | -1.52251559546560 | 0.28070271190088  |
| H | -2.27212200090914 | -1.78492042079600 | -1.43814099641984 |
| H | 1.58303823671750  | 2.87428152495171  | 1.66828326433465  |
| H | -0.11923039205823 | 2.83534460541530  | 2.16561768042882  |
| H | -0.83939431056705 | 3.65409493618585  | -1.23383543517796 |
| H | 0.71580027018193  | 3.01989758231035  | -1.80591381710803 |
| H | 0.53867900151768  | 5.60679856723104  | -0.89956321746184 |
| H | 1.95711418502397  | 4.63636705699811  | -0.50621515484659 |
| H | 1.12936068443174  | 5.24290219902775  | 1.71721179763689  |
| H | -0.54461945054404 | 5.01396983079481  | 1.21413460032797  |

**Ge(cat<sup>Br</sup>)<sub>2</sub>(THF)**

|    |                   |                   |                   |
|----|-------------------|-------------------|-------------------|
| Ge | -0.30103180689433 | 1.18517493425011  | -0.11908771841232 |
| Br | -6.71215348263690 | -0.78247505799231 | -0.21359523292970 |
| Br | -3.99335127617363 | 4.07455112796078  | 1.06048198143827  |
| Br | 3.48563995310586  | -0.67162455075268 | 2.15389184763836  |
| Br | 5.67604371689613  | 0.70330395279344  | -2.93392760986214 |
| Br | 2.64789617184536  | 1.73299180800728  | -3.85275825189138 |
| Br | -3.75131320312395 | -2.16618523317417 | -0.84709959504277 |
| Br | -6.83895521295373 | 2.36642266700790  | 0.74984891692825  |
| Br | 6.09934005131591  | -0.51037242675029 | 0.10056349710551  |
| O  | 0.81631377190752  | 2.93065548828730  | 0.48088329596904  |
| O  | 0.97881301322277  | 0.31072742834442  | 0.76616516256786  |
| O  | 0.64601053727272  | 1.27565432721842  | -1.62515994384695 |
| O  | -1.52159117251401 | -0.11435605339404 | -0.38754146923792 |
| O  | -1.62070830513242 | 2.29424124036720  | 0.34762387804065  |
| C  | 0.82710801058924  | 4.14969618813569  | -0.29183732426645 |
| C  | 1.10431105541744  | 3.19284358561992  | 1.87320761011405  |
| C  | 1.16013456606573  | 4.70705885737465  | 1.98139079657873  |
| C  | 1.58627611167624  | 5.12962240458189  | 0.57951725112206  |
| C  | 3.32674014985639  | -0.03484156687676 | 0.40777480118791  |

|   |                   |                   |                   |
|---|-------------------|-------------------|-------------------|
| C | 4.41336753501844  | 0.05538243418919  | -0.46990640803148 |
| C | 4.23429092721557  | 0.56946260803078  | -1.75445992205761 |
| C | 2.96737715366900  | 0.99625892221745  | -2.16925226212493 |
| C | -4.02020618063432 | 2.28802889869109  | 0.52056188423019  |
| C | -5.20045007343293 | 1.54854782543609  | 0.38282095254898  |
| C | -5.14404050908914 | 0.21423553705922  | -0.02575482446283 |
| C | -3.91238441039853 | -0.39320125947184 | -0.29989117183244 |
| C | 1.89627265499253  | 0.88267714247773  | -1.30544923416353 |
| C | 2.07550127151686  | 0.36595233509566  | -0.01704037766712 |
| C | -2.75366235839187 | 0.34728863930726  | -0.16118390527667 |
| C | -2.81635426213045 | 1.67695750210704  | 0.24604577217572  |
| H | 2.05737316934965  | 2.71992804905501  | 2.11579657073018  |
| H | 0.32583645039621  | 2.75116989876010  | 2.49554690505669  |
| H | -0.20128864787454 | 4.47494992419696  | -0.46510907658329 |
| H | 1.30445722320795  | 3.94229101605016  | -1.24864713793136 |
| H | 1.32844882020744  | 6.16208191432386  | 0.34803528080850  |
| H | 2.66332616152135  | 5.01380932704235  | 0.44575338946158  |
| H | 1.85221792665032  | 5.03191638756939  | 2.75690142405201  |
| H | 0.17500966016412  | 5.11172907625359  | 2.21964364206632  |

**Ge(cat<sup>Br</sup>)<sub>2</sub>**

|    |                   |                   |                   |
|----|-------------------|-------------------|-------------------|
| Ge | -0.30238604626443 | 0.71799447246471  | 0.08057810093298  |
| O  | -1.44870452184273 | 1.68695870533160  | 1.00033814420409  |
| O  | -1.55999528169687 | -0.12962768775273 | -0.81210091670894 |
| O  | 0.93720715102335  | 1.55981816943465  | -0.84238984764429 |
| O  | 0.86209664165224  | -0.24382497406978 | 0.98470280199913  |
| C  | -2.69670779037834 | 1.32867532899042  | 0.60233138891606  |
| C  | -2.75715711047678 | 0.34450004890551  | -0.37945496272131 |
| C  | 2.10206376048530  | 0.11383696920876  | 0.56165013060354  |
| C  | 2.14287325407458  | 1.09101673581571  | -0.42807318928899 |
| C  | -3.97001024960063 | -0.10204321896469 | -0.86339687002693 |
| C  | -5.14574932323201 | 0.45391475849052  | -0.34726906270900 |
| C  | -5.08515290436210 | 1.44205916312101  | 0.63968388073773  |
| C  | -3.84827144826111 | 1.88510246463516  | 1.12104011673697  |

|    |                   |                   |                   |
|----|-------------------|-------------------|-------------------|
| C  | 3.34599209089935  | 1.53679492333596  | -0.93645104863835 |
| C  | 4.53190228688151  | 0.98693147295547  | -0.43736611397403 |
| C  | 4.49100289588648  | 0.00560630459796  | 0.55739668074137  |
| C  | 3.26383882770408  | -0.43658608319892 | 1.06372761002676  |
| Br | -3.67489779328968 | 3.19444922480998  | 2.43218416373435  |
| Br | -6.79192961169024 | -0.14047091457303 | -0.99292862462284 |
| Br | -6.64942140357433 | 2.18681111341051  | 1.33160971254998  |
| Br | 3.11655666358613  | -1.73695780078699 | 2.38694919737619  |
| Br | 6.16508309553262  | 1.58021895803554  | -1.11617114652446 |
| Br | 6.06894205447297  | -0.73096737826468 | 1.22663382340852  |
| Br | 3.30722373224452  | 2.84628848324013  | -2.25838882631018 |
| Br | -3.95746896977395 | -1.42096923917281 | -2.17645514279835 |

#### ACN

|   |                   |                  |                   |
|---|-------------------|------------------|-------------------|
| N | -2.91598372023246 | 0.46160253874396 | 0.00000735435015  |
| C | -2.97758951298266 | 1.60908832137919 | -0.00000965345602 |
| C | -3.05542132591543 | 3.05829118134895 | -0.0000039175509  |
| H | -2.19302285515126 | 3.48351611323346 | -0.50992196067509 |
| H | -3.95802837409244 | 3.38872256757766 | -0.51057078460075 |
| H | -3.07608782562574 | 3.43608027961679 | 1.02049669443680  |

#### THF

|   |                   |                  |                   |
|---|-------------------|------------------|-------------------|
| O | -6.22377652708292 | 3.50894113924272 | -0.00327783072972 |
| C | -4.97763524681156 | 4.15830562140470 | -0.15504853063773 |
| C | -5.20459308839107 | 5.61885795399477 | 0.21837295126915  |
| C | -7.25814161826486 | 4.45869905996542 | 0.15698780959056  |
| C | -6.65788557570859 | 5.81391597570245 | -0.19993059443893 |
| H | -4.63189662389681 | 4.07471653105655 | -1.19327161820590 |
| H | -4.23209646856422 | 3.67130503636690 | 0.47887729120479  |
| H | -7.61594609923491 | 4.45623979454221 | 1.19447679165567  |
| H | -8.10343007573637 | 4.18985849134202 | -0.48181718765805 |
| H | -4.51228849499671 | 6.29511453009128 | -0.28280420217783 |
| H | -5.09392460537543 | 5.76770298588703 | 1.29494386006117  |
| H | -6.72422708791566 | 5.99871687166726 | -1.27457880103682 |
| H | -7.15094701602086 | 6.64139463733668 | 0.30991499640364  |

**Styrene**

|   |                   |                   |                   |
|---|-------------------|-------------------|-------------------|
| C | -3.37168473241895 | 5.81893049726451  | 0.00000003203160  |
| C | -4.52932917186881 | 5.16349755849830  | -0.00000008058496 |
| C | -4.73013335804996 | 3.71162934920579  | -0.00000010803407 |
| C | -3.67513842956313 | 2.79639448956100  | -0.00000027376346 |
| C | -3.91726495547273 | 1.43489060426253  | -0.00000028338993 |
| C | -5.22014950328438 | 0.95214894193476  | -0.00000018195201 |
| C | -6.27793423685541 | 1.84696477643273  | -0.00000005971628 |
| C | -6.03191630767565 | 3.21114164076429  | 0.00000001091718  |
| H | -3.34807239837424 | 6.89919673711776  | 0.00000002975616  |
| H | -2.41034731855681 | 5.32233579381406  | 0.00000012821773  |
| H | -5.44337744572938 | 5.74931376997370  | -0.00000016791037 |
| H | -2.65142111506185 | 3.14773953993637  | -0.00000039729432 |
| H | -3.08472114937936 | 0.74353148742580  | -0.00000041326973 |
| H | -7.29734848805969 | 1.48412638796051  | 0.00000000520432  |
| H | -5.40616961863859 | -0.11364098367349 | -0.00000021899467 |
| H | -6.86538245171103 | 3.90368187122136  | 0.00000010288279  |

**Ge(cat<sup>Br</sup>)<sub>2</sub>(styrene)**

|    |                   |                   |                   |
|----|-------------------|-------------------|-------------------|
| Br | -2.53810425589012 | 4.72863320288723  | 1.40366887916337  |
| Br | -7.39288346830008 | 2.10655516628280  | -0.05857975621335 |
| Br | 1.97078547401434  | -2.08163834439457 | 2.92462655746158  |
| Br | 4.83872517185579  | -2.03402818375730 | -2.00714153613318 |
| Br | 4.65140320146568  | -2.94093454451454 | 1.15334524908673  |
| Br | -5.60128095286593 | -0.59431754117247 | -0.81413527375939 |
| Br | -5.84769463873860 | 4.79117602303127  | 1.05926199044700  |
| Br | 2.34796849750477  | -0.27062514434524 | -3.33199524050191 |
| Ge | -0.97987212383111 | 0.38050748517933  | 0.05676465702255  |
| O  | -1.43975930168916 | 2.00762619585398  | 0.56762066378577  |
| O  | -2.64271606329175 | -0.07405988090617 | -0.30739038587341 |
| O  | 0.19068845811671  | 0.24687765303825  | -1.25121701124421 |
| O  | 0.03021295234346  | -0.48743178172174 | 1.20632982837188  |
| C  | -2.27406014872795 | -2.93879564526469 | 2.11739780536654  |
| C  | -2.78436925669981 | 2.11686839498057  | 0.45341218856618  |

|   |                   |                   |                   |
|---|-------------------|-------------------|-------------------|
| C | -3.43912189989568 | 0.98369873521377  | -0.01872856421578 |
| C | 1.15977817107030  | -0.85614610098949 | 0.55316087192887  |
| C | 1.24489498929691  | -0.46210534901311 | -0.77865233428884 |
| C | -4.80960741212322 | 0.96657256725906  | -0.17448023810977 |
| C | -5.53862021946431 | 2.11580800422425  | 0.14989385500268  |
| C | -4.88216684734324 | 3.25498052465184  | 0.62396839724299  |
| C | -3.49102685299981 | 3.25713675571184  | 0.77827443674912  |
| C | 2.33910528369897  | -0.79935935485923 | -1.54733141949237 |
| C | 3.37053660904131  | -1.54113076344637 | -0.96457280059645 |
| C | 3.28938286022415  | -1.92845100336444 | 0.37498000308640  |
| C | 2.17377144440963  | -1.58175479003116 | 1.14218914289386  |
| C | -2.38638931032434 | -3.04022025908391 | 0.79555075247085  |
| C | -1.28252039875494 | -3.27925216337215 | -0.14232132078277 |
| C | -1.39567780230606 | -2.84646147427530 | -1.46591689538613 |
| C | -0.35753605621841 | -3.03066064737799 | -2.36760514311376 |
| C | 0.80515581249718  | -3.67188706706876 | -1.96830038359497 |
| C | 0.91960137817664  | -4.13215050926106 | -0.66304979123401 |
| C | -0.11120489572027 | -3.93684491450275 | 0.24010836718740  |
| H | -3.14252039009756 | -2.76348863995389 | 2.73658213581044  |
| H | -1.32255805077109 | -3.01146743179701 | 2.62838108036780  |
| H | -3.36493158391677 | -2.91006879313806 | 0.34542105931893  |
| H | 1.61541341149408  | -3.81890715462679 | -2.67045317011761 |
| H | -0.01483539492337 | -4.31849431587159 | 1.24834430225333  |
| H | 1.81671933238030  | -4.64958875772885 | -0.34843961069592 |
| H | -2.31004179206679 | -2.36546988838466 | -1.79265147140762 |
| H | -0.45895181722966 | -2.67438371469070 | -3.38412118682281 |

***cis*-Ge(cat<sup>Br</sup>)<sub>2</sub>(styrene)(ACN)**

|    |                   |                   |                   |
|----|-------------------|-------------------|-------------------|
| Br | 2.47617208421489  | 3.91357133068248  | -2.15035179917271 |
| Br | -7.21792842465876 | 0.47530183723395  | -1.79446927020756 |
| Br | -2.86967319225950 | -1.79504474777100 | -4.72149775784420 |
| Br | 6.04323437118862  | -0.26126612782609 | -0.59093447158561 |
| Br | 5.57823341266672  | 2.83915223313549  | -1.60772000014008 |
| Br | 3.39728644626000  | -2.23020522812550 | -0.14916112448209 |

|    |                   |                   |                   |
|----|-------------------|-------------------|-------------------|
| Br | -6.14085822197850 | -1.27100107909791 | -4.37439740642761 |
| Br | -5.00045674836557 | 1.66456081192447  | 0.38807258551780  |
| Ge | -0.56352369409593 | 0.35873693232002  | -1.02779090484336 |
| O  | 0.84463513064283  | -0.74693960387430 | -0.85537588359462 |
| O  | 0.47456797390431  | 1.69158966412599  | -1.61093607197818 |
| O  | -1.34893342201452 | -0.43502528964570 | -2.44472501237672 |
| O  | -2.17651329774410 | 0.89051712153336  | -0.46384044918282 |
| N  | -0.10776143707422 | 0.92642994532741  | 1.00121794067016  |
| C  | 0.44735109549289  | 1.63346919260445  | 3.42499485052682  |
| C  | 0.13755624192271  | 1.21968782794246  | 2.07713811947067  |
| C  | -1.08725954955569 | -2.46737281542037 | 0.92172689702554  |
| C  | -1.97554324428705 | -2.64937453010291 | -0.12677408600341 |
| C  | -3.32449650648696 | -2.35049120638697 | 0.03596909921241  |
| C  | -3.77464571601940 | -1.85900462080901 | 1.25056480391877  |
| C  | -2.88430183676237 | -1.67710509854130 | 2.29721824856234  |
| C  | -1.53041473488944 | -1.97737221053708 | 2.15335597191377  |
| C  | -0.63033783420363 | -1.79346374636139 | 3.29481024547986  |
| C  | 3.22369718339341  | -0.46637328691442 | -0.73871085283242 |
| C  | 4.32108677045090  | 0.38164526085414  | -0.92630498409677 |
| C  | 4.12341857274631  | 1.69425846419153  | -1.35547248264505 |
| C  | 2.82789947959750  | 2.16838801162699  | -1.59644141764629 |
| C  | -4.47780675414196 | 0.69913202534463  | -1.12033186056470 |
| C  | -5.39001241033529 | 0.17582669163062  | -2.04383333737823 |
| C  | -4.93301467391966 | -0.56467137370459 | -3.13580761518688 |
| C  | -3.56189207249563 | -0.78768010612019 | -3.31379785252476 |
| C  | 1.75144159757124  | 1.32059878009044  | -1.42099518280311 |
| C  | 1.95009912740224  | 0.00050422931901  | -0.99842880462275 |
| C  | -2.66983630837575 | -0.25628950736917 | -2.40291708763907 |
| C  | -3.13074050924716 | 0.47774088953112  | -1.31071578093320 |
| C  | 0.70224683833631  | -1.77956811268739 | 3.26894862756424  |
| H  | 1.27202855223157  | -1.67292358045535 | 4.18204957578496  |
| H  | 1.27465121077562  | -1.89708087457849 | 2.35712877408236  |
| H  | -0.31430853353266 | 1.25843518797269  | 4.10457614679488  |



|   |                   |                   |                   |
|---|-------------------|-------------------|-------------------|
| H | 1.41314441145787  | 1.22945864182228  | 3.71999174088180  |
| H | 0.47753569797214  | 2.72066671953258  | 3.47457959453312  |
| H | -4.82107918707052 | -1.62034000590044 | 1.38457985749474  |
| H | -3.24908842749754 | -1.30131045543604 | 3.24610839618276  |
| H | -1.61907727351525 | -3.05204145237564 | -1.06601991305149 |
| H | -0.05013771211567 | -2.74325485922507 | 0.78600978693730  |
| H | -4.01994173036474 | -2.51382527734324 | -0.77722049749746 |
| H | -1.12501382722027 | -1.66349351783643 | 4.25368966800684  |

***trans*-Ge(cat<sup>Br</sup>)<sub>2</sub>(styrene)(ACN)**

|    |                   |                   |                   |
|----|-------------------|-------------------|-------------------|
| Br | 2.71251120391968  | 2.87123956146559  | -2.88879258788378 |
| Br | -6.41258153962015 | -3.42383383960162 | -1.07274178362516 |
| Br | -4.37144063081370 | 1.79748680432881  | -2.15210479219482 |
| Br | 6.33351100015721  | -1.54285720729743 | -2.99852373140326 |
| Br | 5.81858206948521  | 1.70792560405282  | -3.18100592086626 |
| Br | 3.73237622555357  | -3.56768661227873 | -2.52695944713544 |
| Br | -6.96168960271973 | -0.21006586220686 | -1.55958012569173 |
| Br | -3.29772849571419 | -4.57923859539112 | -1.26693251762264 |
| Ge | -0.31745721922767 | -0.88051067556333 | -2.27960890633979 |
| O  | 1.15741249730564  | -1.94193166569872 | -2.36174895463483 |
| O  | 0.76039107444011  | 0.56034100027051  | -2.50236557060279 |
| O  | -1.78098180271965 | 0.19041131349533  | -2.15004235195251 |
| O  | -1.36325631962315 | -2.28767772705651 | -1.81989501087055 |
| N  | -0.65411364898934 | -1.13272187352036 | -4.31362133893205 |
| C  | -1.12403725992794 | -1.46758156610719 | -6.83268016999421 |
| C  | -0.86211928727607 | -1.28035213409230 | -5.42596838789510 |
| C  | -1.78472604737787 | -2.17573776163261 | 1.50098073222516  |
| C  | -2.98364339635570 | -2.74230070758844 | 1.89086635693147  |
| C  | -4.14566954309522 | -1.98086202408775 | 1.90651724724924  |
| C  | -4.09860700062362 | -0.64337657307825 | 1.54543044410399  |
| C  | -2.89547851319915 | -0.07418123275119 | 1.16265684834192  |
| C  | -1.72598037162959 | -0.83339844613644 | 1.12146251120800  |
| C  | -0.49450663610616 | -0.19929490176901 | 0.65489660395698  |
| C  | 3.52858175915067  | -1.71656200314587 | -2.65269863471391 |

|   |                   |                   |                   |
|---|-------------------|-------------------|-------------------|
| C | 4.60657569189813  | -0.84386533146966 | -2.84580876677535 |
| C | 4.38878293614940  | 0.53187898577508  | -2.92281427662951 |
| C | 3.09098704452368  | 1.04553869222405  | -2.80684498705875 |
| C | -3.69385475689887 | -2.77334429572962 | -1.51804073055432 |
| C | -4.99738303916811 | -2.26498387832434 | -1.45924751184960 |
| C | -5.22892808305491 | -0.90647954690654 | -1.66294642658576 |
| C | -4.15763177928943 | -0.04337105070459 | -1.92134764323838 |
| C | 2.03176727071962  | 0.17702810158545  | -2.62556438119257 |
| C | 2.24992998540539  | -1.20301685090391 | -2.54820050666773 |
| C | -2.87394804134159 | -0.54839993243576 | -1.95819105138417 |
| C | -2.64245913510865 | -1.91400748271724 | -1.76335334769075 |
| C | 0.66922990789102  | -0.80523671102585 | 0.37327575627002  |
| H | -1.81780688096925 | -2.29528678958571 | -6.96827823326291 |
| H | -1.56089403511072 | -0.56146287797951 | -7.24825214756966 |
| H | -0.19404963844448 | -1.69007881951093 | -7.35257624645698 |
| H | 1.54739733116489  | -0.22108934656496 | 0.13200297252300  |
| H | 0.81818100449867  | -1.87118950282542 | 0.48754996452381  |
| H | -5.00069374176917 | -0.04617662571306 | 1.54771326044669  |
| H | -2.86461808189508 | 0.96820463719011  | 0.86773657586128  |
| H | -3.01758737019159 | -3.78601964631692 | 2.17177915354047  |
| H | -0.89142911978193 | -2.78572131884067 | 1.48884690234725  |
| H | -5.08585925993430 | -2.43242910883729 | 2.19355771106936  |
| H | -0.54413889038558 | 0.87847475760820  | 0.53162053587697  |

**phenylacetylene**

|   |                   |                  |                   |
|---|-------------------|------------------|-------------------|
| C | -6.98761875575464 | 5.23909764390422 | 0.00009591028875  |
| C | -8.20527330819041 | 4.58064748424564 | 0.00007972524715  |
| C | -8.24950429885359 | 3.19359491951808 | -0.00002162971191 |
| C | -7.06845840144096 | 2.46483455531116 | -0.00010769170523 |
| C | -5.84733699670827 | 3.11677445350757 | -0.00009198849081 |
| C | -5.79589311674879 | 4.51193428803079 | 0.00000936298918  |
| C | -4.54019347560120 | 5.18645264328379 | 0.00002071498481  |
| C | -3.48053030634859 | 5.75380589558236 | -0.00001339142042 |
| H | -2.54492557072925 | 6.25848546317177 | -0.00003284738204 |

|   |                   |                  |                   |
|---|-------------------|------------------|-------------------|
| H | -6.94955567020334 | 6.31996623076856 | 0.00017449573996  |
| H | -9.20254281469515 | 2.68155131794650 | -0.00003398014926 |
| H | -9.12349357408589 | 5.15272932944123 | 0.00014679310050  |
| H | -7.09824746316154 | 1.38339303575007 | -0.00018733821002 |
| H | -4.92499823467836 | 2.55195979653824 | -0.00015975828066 |

***trans*-Ge(cat<sup>Br</sup>)<sub>2</sub>(PhCCH)(ACN)**

|    |                   |                   |                   |
|----|-------------------|-------------------|-------------------|
| Br | -3.32803086993068 | -4.55609567342666 | -1.36968626624676 |
| Br | -6.93488500020177 | -0.13056880602669 | -1.45815088478867 |
| Br | 3.75053815508885  | -3.54339559806437 | -2.33272900171223 |
| Br | 5.82621232338845  | 1.67182720921775  | -3.38090097647279 |
| Br | 6.34570750580414  | -1.55616349878540 | -2.96552525226588 |
| Br | -4.32654055929395 | 1.86082119587988  | -2.02423352129218 |
| Br | -6.42321190256815 | -3.36622069324566 | -1.08815943575530 |
| Br | 2.72050866244903  | 2.85143419199804  | -3.15590724580951 |
| Ge | -0.30060673589197 | -0.85270143164874 | -2.24074590916521 |
| O  | -1.36795369417507 | -2.26908351698529 | -1.83995924551138 |
| O  | -1.75861748981492 | 0.22305472725205  | -2.10692239380532 |
| O  | 0.77420642914525  | 0.57422685695964  | -2.58769609865373 |
| O  | 1.17526113203240  | -1.91311712157083 | -2.26750350307758 |
| N  | -0.63282083355924 | -1.14440804928149 | -4.28384778610479 |
| C  | 0.59309542772432  | -0.34615856415087 | 0.20974485177410  |
| C  | -2.64117284123121 | -1.88329611643384 | -1.77751203124775 |
| C  | -2.85748372305514 | -0.50906411829431 | -1.92937679019821 |
| C  | 2.26398052098533  | -1.18789065104908 | -2.51432168710012 |
| C  | 2.04318704169362  | 0.18341174307704  | -2.69162367239505 |
| C  | -4.13425895018996 | 0.01103274748278  | -1.85820623227184 |
| C  | -5.21341970808916 | -0.84601944181427 | -1.61165958466225 |
| C  | -4.99792061707270 | -2.21376412942944 | -1.45747923639400 |
| C  | -3.70245807213602 | -2.73684963519678 | -1.55173671368502 |
| C  | 3.10192309996761  | 1.03725809593506  | -2.94194406399665 |
| C  | 4.39893707068835  | 0.51719266195287  | -3.02857029061254 |
| C  | 4.61874056299884  | -0.84957122258558 | -2.85252283675879 |
| C  | 3.54366875007533  | -1.70665270484960 | -2.58858144030838 |

|   |                   |                   |                   |
|---|-------------------|-------------------|-------------------|
| C | -0.47745167563025 | -0.70076224021702 | 0.64716323258648  |
| C | -1.74078051975266 | -1.13623407279190 | 1.12947533225933  |
| C | -2.80544829157201 | -0.23613777562104 | 1.21579938679719  |
| C | -4.04816709204889 | -0.68183767773835 | 1.62668758938841  |
| C | -4.23223326724673 | -2.01675092819192 | 1.96223356003137  |
| C | -3.17166770827714 | -2.90942751815394 | 1.89264591833972  |
| C | -1.92709173932689 | -2.47630663042899 | 1.47268221764531  |
| C | -0.82163042221622 | -1.30267607544563 | -5.39825725915234 |
| C | -1.06051012391709 | -1.50292970856116 | -6.80763080171254 |
| H | 1.59110529675003  | -0.00225352558490 | 0.05144891665746  |
| H | -5.21014048740440 | -2.36469699321465 | 2.26674547281912  |
| H | -1.10189932333322 | -3.16927192644747 | 1.38566718166177  |
| H | -3.32120018915339 | -3.95014095258773 | 2.14420262908989  |
| H | -2.65542663793764 | 0.79880529997439  | 0.93827904009726  |
| H | -4.87909247001849 | 0.00913342262264  | 1.66966528827544  |
| H | -0.23798414797835 | -2.06771499304303 | -7.24246075361179 |
| H | -1.13801216566534 | -0.53915839519934 | -7.30729263029833 |
| H | -1.98796892700282 | -2.05521376618594 | -6.94714975495554 |

***para-tolualdehyde***

|   |                   |                   |                   |
|---|-------------------|-------------------|-------------------|
| O | 0.19777698124044  | -0.87507039166112 | 0.00793253151958  |
| C | -0.91258636467423 | -1.33738708693362 | -0.00009903728504 |
| C | -3.29786908879386 | 1.56661297579643  | 0.00970799776627  |
| C | -2.12047964710336 | 0.84807847075052  | 0.00979088703918  |
| C | -2.15431121264994 | -0.54618508848792 | 0.00003187079209  |
| C | -3.38164615442405 | -1.19572734877033 | -0.00969966584254 |
| C | -4.56155049177592 | -0.46876702601926 | -0.00972206455200 |
| C | -4.53740120558812 | 0.92124678558086  | -0.00003554309212 |
| C | -5.80501745533497 | 1.72150387033159  | 0.00006530430556  |
| H | -1.07438780092342 | -2.43451887984404 | -0.00843438117501 |
| H | -1.16538800722199 | 1.35699223066845  | 0.01738818871690  |
| H | -3.41665133365831 | -2.27944964124301 | -0.01731684956313 |
| H | -5.51208687392602 | -0.98753301686091 | -0.01735460133669 |
| H | -3.26306051722655 | 2.64959547359158  | 0.01732794653089  |

|   |                   |                  |                   |
|---|-------------------|------------------|-------------------|
| H | -5.86699337929768 | 2.36103054897259 | 0.88175322526951  |
| H | -5.85967727020142 | 2.37284520488013 | -0.87342110322125 |
| H | -6.68662283134058 | 1.08266759744803 | -0.00791821667219 |

***trans*-Ge(cat<sup>Br</sup>)<sub>2</sub>(*para*-tolualdehyde)(ACN)**

|    |                   |                   |                   |
|----|-------------------|-------------------|-------------------|
| Br | 2.47781483479685  | 0.08493108987730  | -3.50982911769560 |
| Br | -6.78451705956199 | 1.97997278201583  | 2.58616173448771  |
| Br | -4.55358618888868 | 1.31466464121762  | -2.62897758274143 |
| Br | 5.97846091374538  | -0.27242374021823 | 0.98823507610262  |
| Br | 5.55003691416553  | -0.29731119738135 | -2.28158965082896 |
| Br | 3.32842040357312  | 0.12939768709185  | 2.96252621662559  |
| Br | -7.18636596733833 | 1.93991767472368  | -0.68692324291165 |
| Br | -3.76297387528248 | 1.38501280991241  | 3.85081264310024  |
| Ge | -0.64469353331114 | 0.61212661940738  | 0.19678157559859  |
| O  | -0.99406589792847 | -1.38041258614654 | 0.24051332968046  |
| O  | 0.80383414501850  | 0.42395260105626  | 1.28510361581388  |
| O  | 0.47446225513644  | 0.42100802963282  | -1.24257239552732 |
| O  | -2.07203157119451 | 0.87153258831756  | -0.92314678003530 |
| O  | -1.76620249267811 | 0.87989263266327  | 1.60735922316596  |
| N  | -0.27585358446157 | 2.72831470748780  | 0.14774659228784  |
| C  | 0.19074066217453  | 5.27194470192072  | 0.14425888993357  |
| C  | -0.07010810329811 | 3.85119016410038  | 0.14535244395729  |
| C  | -2.25827674796767 | -7.68553392936763 | -0.61919094909404 |
| C  | -1.46218079884575 | -4.16899380262003 | 0.51498304557523  |
| C  | -1.70850375887163 | -5.52220422605268 | 0.52442427335330  |
| C  | -1.99468247437872 | -6.21309405764952 | -0.65915950968459 |
| C  | -2.02714860458028 | -5.50788545008028 | -1.85950518962953 |
| C  | -1.78089916246852 | -4.14854674982184 | -1.88190623355135 |
| C  | -1.49714638978053 | -3.46835163309088 | -0.69734404605534 |
| C  | -1.24879775492450 | -2.05406519711145 | -0.76177274202480 |
| C  | 3.17154111020735  | 0.10447260627644  | 1.10189670850486  |
| C  | 4.27237065578989  | -0.06293688311999 | 0.25072784038934  |
| C  | 4.09238327414097  | -0.07237208753117 | -1.13066312530481 |
| C  | 2.80924229632671  | 0.08850532957263  | -1.67003923377848 |

|   |                   |                   |                   |
|---|-------------------|-------------------|-------------------|
| C | -4.07384444608727 | 1.38515232844672  | 2.00932631900155  |
| C | -5.33668610312627 | 1.63178437767025  | 1.45387442706419  |
| C | -5.50722088101104 | 1.61685115375001  | 0.07132814721651  |
| C | -4.41339578252003 | 1.35864639406256  | -0.76547059028108 |
| C | 1.72818174461655  | 0.25596049797882  | -0.82681153891797 |
| C | 1.90807569632132  | 0.26078001418657  | 0.56414975996415  |
| C | -3.17009387161513 | 1.12070971269374  | -0.21321879575634 |
| C | -2.99920794493049 | 1.12895397688306  | 1.17894892328986  |
| H | -1.29358891054722 | -1.57997988801609 | -1.74880444302196 |
| H | -0.17678128908596 | 5.71399886310862  | -0.77969354825623 |
| H | -0.31237963830718 | 5.73838074356022  | 0.98906135114569  |
| H | 1.26162201945826  | 5.44876967437188  | 0.22417365782485  |
| H | -1.39423972271202 | -8.22452470528297 | -0.22796809837370 |
| H | -3.10091967624329 | -7.91246669405432 | 0.03545018374992  |
| H | -2.48338065378105 | -8.08624911728669 | -1.60553599632667 |
| H | -2.24731372684176 | -6.02939088433506 | -2.78177529409465 |
| H | -1.80886163913794 | -3.60944272462058 | -2.82131514844627 |
| H | -1.68139276136338 | -6.06332956405773 | 1.46197503283817  |
| H | -1.24268530900030 | -3.64499493744124 | 1.43564857226672  |

**HSiEt<sub>3</sub>**

|    |                   |                   |                   |
|----|-------------------|-------------------|-------------------|
| Si | -3.29638235618199 | 0.96236643459578  | 0.09354523098166  |
| C  | -1.41358955497644 | 1.08979808405629  | 0.20981041370591  |
| C  | -3.99263084423205 | 2.34857751070453  | -0.98735775330339 |
| C  | -3.80908978944146 | -0.72866476099756 | -0.57910619501682 |
| C  | -0.92347689235911 | 2.42333668418980  | 0.77310475287066  |
| C  | -5.51581280760574 | 2.32292533107657  | -1.11000697522672 |
| C  | -3.30358289224391 | -1.90080968413376 | 0.26136077373888  |
| H  | -3.86231885402641 | 1.11102334513536  | 1.46969567155474  |
| H  | -0.98477035594455 | 0.92386681561198  | -0.78381302808632 |
| H  | -1.04115597550099 | 0.26908842855399  | 0.83005386715430  |
| H  | -1.22355328176165 | 3.26287405827479  | 0.14446995848382  |
| H  | 0.16429678064213  | 2.45387016738499  | 0.85089454373246  |
| H  | -1.32449808422295 | 2.60840058767293  | 1.77083117877598  |

|   |                   |                   |                   |
|---|-------------------|-------------------|-------------------|
| H | -3.67239263038736 | 3.31130758641764  | -0.57798982062486 |
| H | -3.53680439042660 | 2.28665629067577  | -1.98088464057170 |
| H | -5.99771701943864 | 2.39808134737092  | -0.13396513844050 |
| H | -5.86873789488550 | 1.40056250956573  | -1.57338731317296 |
| H | -5.88631745859113 | 3.14942286929833  | -1.71816712925434 |
| H | -3.44938667391284 | -0.82490568432553 | -1.60869861565478 |
| H | -4.90046326811193 | -0.76709353526229 | -0.64558665560612 |
| H | -2.21375208498081 | -1.93181785590375 | 0.29828417965436  |
| H | -3.63813622598242 | -2.85900052736451 | -0.13886464858146 |
| H | -3.65925973012762 | -1.83833062299800 | 1.29098227718720  |

**SiEt<sub>3</sub><sup>+</sup>**

|    |                   |                   |                   |
|----|-------------------|-------------------|-------------------|
| Si | -3.06735107899382 | 0.95263275386031  | -0.18400718007993 |
| C  | -3.06279628288363 | -1.89687674538827 | 0.16091423225622  |
| C  | -5.41438114951241 | 2.27615687781812  | -1.17389845395916 |
| C  | -0.72807327661783 | 2.48159062670305  | 0.47082832356241  |
| C  | -3.89452595906549 | -0.69107156197578 | -0.28129702950013 |
| C  | -3.97633333999027 | 2.47351823311108  | -0.68986473713247 |
| C  | -1.33087592177950 | 1.07609207284691  | 0.42011018309215  |
| H  | -2.76158743441635 | -1.82679634700400 | 1.20492410920730  |
| H  | -3.64629141681731 | -2.80911764073701 | 0.05549082571401  |
| H  | -2.16393919384304 | -2.01912575382551 | -0.44138585029840 |
| H  | -4.82556233732054 | -0.61589336201440 | 0.29723559766385  |
| H  | -4.25020339083506 | -0.80984370575657 | -1.31405870977302 |
| H  | -5.84806980425180 | 3.23500629535410  | -1.45009425732399 |
| H  | -5.46795510866648 | 1.63454236852177  | -2.05203236829858 |
| H  | -6.05125346655352 | 1.84539043501844  | -0.40291027180497 |
| H  | -3.36430010856691 | 2.97308951997095  | -1.45347836707369 |
| H  | -3.93393902103984 | 3.16916156987783  | 0.15951740172050  |
| H  | -1.27698523644080 | 3.13937819042748  | 1.14286953874236  |
| H  | 0.29627262737406  | 2.43334243099213  | 0.83436190892138  |
| H  | -0.69867666471124 | 2.95181455622563  | -0.51085368532584 |
| H  | -1.29958252473645 | 0.59365536387318  | 1.40670603486458  |
| H  | -0.72577064753172 | 0.40579568540055  | -0.20582320717458 |

**ACN--SiEt<sub>3</sub><sup>+</sup>**

|    |                   |                   |                   |
|----|-------------------|-------------------|-------------------|
| Si | -3.28218583404361 | 0.97080465001983  | 0.10786982414197  |
| N  | -4.04339826615922 | 1.15880667389944  | 1.82083540915366  |
| C  | -5.08275460069755 | 1.40920161707696  | 4.17236724806286  |
| C  | -4.50539039561173 | 1.26863344423170  | 2.86108648374357  |
| C  | -1.45990477480805 | 1.11274153045367  | 0.47856909447686  |
| C  | -4.03932944806311 | 2.40643192399121  | -0.81068944829673 |
| C  | -3.88038900526479 | -0.72256980347590 | -0.39524267724645 |
| C  | -1.01274348496691 | 2.48000173755388  | 0.99966901917045  |
| C  | -5.55430352170477 | 2.31952142612705  | -1.00589483758898 |
| C  | -3.33181588215164 | -1.87635335079883 | 0.44658201256617  |
| H  | -5.89201385320369 | 0.69008349510220  | 4.29646293582547  |
| H  | -4.32073274924274 | 1.22709696295184  | 4.92974058539497  |
| H  | -5.47650019921522 | 2.41801116069791  | 4.29367802567728  |
| H  | -0.93225439961010 | 0.87982015076265  | -0.45306910579621 |
| H  | -1.16731723839934 | 0.32058024080211  | 1.17353832318926  |
| H  | -1.22853645479160 | 3.27842760888507  | 0.29040223260427  |
| H  | 0.06146364241938  | 2.49123556096720  | 1.17676740739813  |
| H  | -1.49271848199643 | 2.73911984696310  | 1.94427379629625  |
| H  | -3.76749516075092 | 3.34116472762112  | -0.31222027678072 |
| H  | -3.54141124847017 | 2.45107086552916  | -1.78571778988510 |
| H  | -6.09295812644949 | 2.30253754496396  | -0.05753340170893 |
| H  | -5.84402273922695 | 1.43063830831518  | -1.56540221214320 |
| H  | -5.92003740787259 | 3.18095778292393  | -1.56230275333752 |
| H  | -3.59109314067848 | -0.85750866457502 | -1.44344247534123 |
| H  | -4.97397924271305 | -0.73503221313799 | -0.40095807642491 |
| H  | -2.24431172993530 | -1.93002442658707 | 0.40743260680069  |
| H  | -3.71228135053209 | -2.83036537923451 | 0.08530595111835  |
| H  | -3.62051184425972 | -1.79643824702987 | 1.49544365772975  |

**Ge(cat<sup>Br</sup>)<sub>2</sub>H<sup>-</sup>**

|    |                   |                   |                   |
|----|-------------------|-------------------|-------------------|
| Ge | -0.37586420780018 | -0.58290571765468 | 0.62429698438466  |
| O  | -1.38857865038741 | 0.68255202346988  | 1.47761370457119  |
| O  | -1.81990793515461 | -0.68539358330436 | -0.60481938335951 |



|                                                           |                   |                   |                   |
|-----------------------------------------------------------|-------------------|-------------------|-------------------|
| O                                                         | 0.72962943101808  | -0.17400648645706 | -0.77783749077918 |
| O                                                         | 1.08991778262550  | -0.08294399960002 | 1.72339464722519  |
| C                                                         | -2.55107129884454 | 0.90487765259887  | 0.88045468806733  |
| C                                                         | -2.78057967953978 | 0.14169394882204  | -0.28253341943489 |
| C                                                         | 2.11860848900292  | 0.28958396887159  | 1.00657313634003  |
| C                                                         | 1.92853722850870  | 0.23732011127750  | -0.38941945522507 |
| C                                                         | -3.96764936616331 | 0.30239911431128  | -0.97821748551272 |
| C                                                         | -4.93135260804059 | 1.21510377956107  | -0.52537237841140 |
| C                                                         | -4.69952914242266 | 1.96396733057979  | 0.62174953598831  |
| C                                                         | -3.49623815266877 | 1.80394772385592  | 1.32780252427079  |
| C                                                         | 2.94491884459710  | 0.59528480882188  | -1.25000216237412 |
| C                                                         | 4.18209977554910  | 1.01585585109430  | -0.73569646381120 |
| C                                                         | 4.37568569234622  | 1.06915111396787  | 0.63911703334904  |
| C                                                         | 3.33972471476152  | 0.70525905307657  | 1.51159019290869  |
| Br                                                        | -3.10577558866343 | 2.77137998795284  | 2.88167590029941  |
| Br                                                        | -6.53302336543097 | 1.41073575315864  | -1.48249641633361 |
| Br                                                        | 3.52663999320520  | 0.74687162104069  | 3.37357890062527  |
| Br                                                        | 5.55662434246056  | 1.49708799753710  | -1.91763377530771 |
| Br                                                        | 6.02142089582042  | 1.62477575553405  | 1.34800960367955  |
| Br                                                        | -4.20969629523003 | -0.74342710846162 | -2.51167000012095 |
| H                                                         | -0.45580151814280 | -2.02968922244749 | 1.09835368596704  |
| Br                                                        | -5.97764634927596 | 3.18789440133666  | 1.24325525530728  |
| Br                                                        | 2.60233696786972  | 0.49197412105670  | -3.08710736231346 |
| <b>Ge(cat<sup>Br</sup>)<sub>2</sub>(ACN)H<sup>+</sup></b> |                   |                   |                   |
| Br                                                        | -6.12605974196628 | 0.01420330935886  | -1.42869275135228 |
| Br                                                        | -3.21420365283119 | 1.02322807362404  | 3.38606103710525  |
| Br                                                        | 3.60037909358634  | 0.39908596785962  | 3.28020181198510  |
| Br                                                        | 6.03154228393083  | -1.28282362296895 | -1.61209642219624 |
| Br                                                        | 3.40732552856073  | -0.02387802325955 | -3.23526529472223 |
| Br                                                        | -3.35422833768660 | 0.72249815609613  | -3.13727672700239 |
| Br                                                        | -6.05729844993113 | 0.17238306725462  | 1.86948456228156  |
| Br                                                        | 6.12922511633425  | -1.06801199729575 | 1.68118755284061  |
| Ge                                                        | 0.26031689249041  | 1.89613785624596  | 0.00507625489675  |

|   |                   |                   |                   |
|---|-------------------|-------------------|-------------------|
| H | 0.39244226318023  | 3.41527537772325  | -0.07653868324895 |
| O | 1.51421805191379  | 1.36244894296239  | 1.27084523834077  |
| O | 1.44106165224113  | 1.20054525541329  | -1.24902552006354 |
| O | -1.11400321392460 | 1.49512626657157  | -1.21452159815638 |
| O | -1.05357109079693 | 1.59108499690861  | 1.30655155282808  |
| N | -0.01418518592317 | -1.18279332100160 | 0.13590030707814  |
| C | 3.62010956359592  | 0.24063114611691  | 1.41441634458641  |
| C | 4.67303503287501  | -0.37584267624261 | 0.72044483366246  |
| C | 4.63227874982173  | -0.46608201700812 | -0.66457668212895 |
| C | 3.53798385310719  | 0.06013840614384  | -1.36894015668150 |
| C | -3.34266543328693 | 0.94486886268845  | 1.52046113078143  |
| C | -4.52881629682565 | 0.58068790054312  | 0.86000044261676  |
| C | -4.56021553488674 | 0.52133924442873  | -0.52719657911668 |
| C | -3.40680940740423 | 0.82830158837788  | -1.26771183745865 |
| C | 2.50464812421128  | 0.67061210272958  | -0.68596352120694 |
| C | 2.54478969337630  | 0.76098048702000  | 0.72078883849910  |
| C | -2.24249820761570 | 1.20310407258525  | -0.62161372216176 |
| C | -2.20945771467340 | 1.25735087538460  | 0.79166709874506  |
| C | -2.33823728600440 | -2.28039204929142 | -0.25193811023447 |
| C | -1.04144063282688 | -1.66962017058071 | -0.03269373888500 |
| H | -2.28312940147117 | -3.35476432745467 | -0.08497416968686 |
| H | -2.66869151976047 | -2.09556048779492 | -1.27248308463449 |
| H | -3.07338154060960 | -1.85425022013841 | 0.42904826068985  |

**Ge(cat<sup>Br</sup>)<sub>2</sub>(H)(SiEt<sub>3</sub>)**

|    |                   |                   |                   |
|----|-------------------|-------------------|-------------------|
| Br | -3.92417877197886 | 2.49947363055950  | 1.79261614774001  |
| Br | -5.63114518457656 | 1.41958343141748  | -3.54444375742721 |
| Br | 2.95813901684658  | -2.23359894887443 | 1.46646684118906  |
| Br | 6.60690399125771  | 2.13341509990388  | 1.03349770713525  |
| Br | 6.02101570070226  | -0.99657684440227 | 1.87190700337635  |
| Br | -2.46887029831480 | 0.73273343649861  | -4.32054134507678 |
| Br | -6.36565164585468 | 2.30651304609503  | -0.45939103519663 |
| Br | 4.11857212370767  | 3.97358602601415  | -0.19053498415510 |
| Ge | 0.17503971033249  | 1.23337238672471  | -0.35007756709640 |

|    |                   |                   |                   |
|----|-------------------|-------------------|-------------------|
| Si | -2.36142941251731 | -1.91672358095858 | 0.62563514764569  |
| O  | -1.25641494492913 | 1.76824750593130  | 0.52669874779243  |
| O  | -0.67858709438826 | 1.08462946284637  | -1.88238697758252 |
| O  | 1.55880887231683  | 2.32588515360393  | -0.34015792177407 |
| O  | 1.10717529907648  | -0.11558136895352 | 0.29739139966014  |
| C  | -2.29758443380812 | 1.73456275454101  | -0.34110706259210 |
| C  | -1.98582185831622 | 1.35783930854559  | -1.64484094498519 |
| C  | 2.37715343803582  | 0.31849132177573  | 0.49813757466344  |
| C  | 2.62243626500997  | 1.64306449165222  | 0.14968745840936  |
| C  | -2.96954919244516 | 1.26080744593035  | -2.60720663153352 |
| C  | -4.29132029125524 | 1.55397414609716  | -2.25250742424934 |
| C  | -4.60295771687269 | 1.93525878950269  | -0.94516448228101 |
| C  | -3.59606689297201 | 2.02588956735825  | 0.02145551586912  |
| C  | 3.87791341974597  | 2.19533825370726  | 0.30336140184599  |
| C  | 4.90503823181879  | 1.39866589221556  | 0.82161367989937  |
| C  | 4.65688735800099  | 0.06980471716356  | 1.17654548301170  |
| C  | 3.37929313672097  | -0.47719322396546 | 1.01454294771718  |
| C  | -1.81138277497058 | -1.39672925912248 | 2.35594868009406  |
| C  | -1.96442323900643 | -3.73659094695871 | 0.31778193742813  |
| C  | -4.19104821564447 | -1.55023437430824 | 0.30487548904906  |
| C  | -2.46580831632681 | -2.19542724824539 | 3.48330612151009  |
| C  | -5.15248026913928 | -2.64665430054265 | 0.76691379337725  |
| C  | -0.49046678263288 | -4.07550511153665 | 0.53672504113509  |
| H  | -1.55360276713775 | -1.12730740013470 | -0.35969346367277 |
| H  | -4.45315629076171 | -0.60584937015384 | 0.79031649124110  |
| H  | -0.72266244859213 | -1.49347323263712 | 2.41352111896429  |
| H  | -2.01931937823076 | -0.33073680306929 | 2.48774197576412  |
| H  | -4.32700954187298 | -1.37493334805549 | -0.76661899652138 |
| H  | -2.26062044971619 | -3.99207599034728 | -0.70404765148782 |
| H  | -2.58975285427832 | -4.35723511353204 | 0.96707051148771  |
| H  | -5.07146219846819 | -2.83920873287393 | 1.83749391433529  |
| H  | -4.96370240687378 | -3.59084672356251 | 0.25508987828540  |
| H  | -6.18928552037931 | -2.37298762093304 | 0.56760795968168  |

|   |                   |                   |                   |
|---|-------------------|-------------------|-------------------|
| H | -2.27067236669632 | -3.26518109036858 | 3.39003578545513  |
| H | -3.54849537739269 | -2.06344119261254 | 3.49635365037197  |
| H | -2.09463432986278 | -1.88593361954317 | 4.46122713002108  |
| H | 0.16091235820704  | -3.47175638086296 | -0.09659063415761 |
| H | -0.28077137783067 | -5.12308061904126 | 0.31616609033374  |
| H | -0.18831033633622 | -3.89636954048810 | 1.56987594049908  |

**4-methylacetophenone**

|   |                   |                   |                   |
|---|-------------------|-------------------|-------------------|
| O | 0.14675710448012  | -0.60474296252898 | 0.00907948786621  |
| C | -0.85437367447670 | -2.73511945452452 | -0.00939801771966 |
| C | -5.85470515020612 | 1.79079055402102  | 0.00027057796633  |
| C | -4.58888760876554 | 0.98806488246794  | 0.00019357963177  |
| C | -4.61077511370544 | -0.40035272203160 | -0.00951931742956 |
| C | -3.43426984882288 | -1.13486884558350 | -0.00950225897292 |
| C | -2.19641828485384 | -0.49994604764161 | 0.00026358103268  |
| C | -2.17399557126443 | 0.89761125104748  | 0.01001555321046  |
| C | -3.34647119420338 | 1.62381345514003  | 0.00997623325519  |
| C | -0.89233486069951 | -1.22230502563230 | 0.00090871124031  |
| H | -0.29673396921467 | -3.06717262501743 | -0.88525415402456 |
| H | -0.30344334089276 | -3.07924212965096 | 0.86604074821703  |
| H | -1.82128558034647 | -3.22831611997645 | -0.01648885822009 |
| H | -6.73758071253787 | 1.15350900934029  | -0.00784404831303 |
| H | -5.90824131826957 | 2.44239486701549  | -0.87314329192909 |
| H | -5.91571905367503 | 2.43042716651608  | 0.88199955580921  |
| H | -3.30147267293149 | 2.70653828619944  | 0.01767934817171  |
| H | -5.56074273243573 | -0.92050468595440 | -0.01724752224956 |
| H | -3.50584135201994 | -2.21346109661410 | -0.01728863280479 |
| H | -1.22113543595872 | 1.40906837990809  | 0.01767772836236  |

*trans*-Ge(cat<sup>Br</sup>)<sub>2</sub>(*para*-methylacetophenone)(ACN)

|    |                   |                   |                   |
|----|-------------------|-------------------|-------------------|
| Br | -4.00916053019929 | 0.96373639158143  | 3.66610252416828  |
| Br | -7.14066127781577 | 2.72096436899840  | -0.77539250824444 |
| Br | 2.99573715587340  | -0.63304393505974 | 2.81950515962830  |
| Br | 5.44010289723632  | -0.33827834524508 | -2.33441926005052 |
| Br | 5.70737119259611  | -0.89440434925876 | 0.90594018221958  |

|    |                   |                   |                   |
|----|-------------------|-------------------|-------------------|
| Br | -4.48622788257005 | 2.21397798513682  | -2.72349756037746 |
| Br | -6.89690269591302 | 2.09191315773254  | 2.45292655662455  |
| Br | 2.46501927359075  | 0.48100697487774  | -3.59087461894297 |
| Ge | -0.79554204422775 | 0.60970348655223  | 0.02689005308476  |
| O  | -1.96101789566068 | 0.70127367495202  | 1.42662907373068  |
| O  | -2.14269741695920 | 1.20792910669646  | -1.06160793297766 |
| O  | 0.39140622776238  | 0.62238302594698  | -1.36915716698076 |
| O  | 0.58721337322673  | 0.14866676734657  | 1.12593615576270  |
| O  | -1.22959558493980 | -1.31726048474731 | -0.25227961982385 |
| N  | -0.29297670605759 | 2.68377108869607  | 0.39868580733952  |
| C  | -1.44884162370037 | -1.56099033750043 | -2.62090184337244 |
| C  | -3.14299006155429 | 1.14959102910322  | 1.01980091251719  |
| C  | -3.24628483918343 | 1.42572414144915  | -0.35130679463651 |
| C  | 1.71284571419390  | 0.03130637469703  | 0.43229380144678  |
| C  | 1.60515476793731  | 0.28486536700148  | -0.94341841943194 |
| C  | -4.43342618646489 | 1.88850991417945  | -0.88350528974753 |
| C  | -5.53792804402145 | 2.09080003240169  | -0.04542156217525 |
| C  | -5.43445820074443 | 1.82332516873045  | 1.31783822171620  |
| C  | -4.22852197056832 | 1.34885685863989  | 1.85171084295611  |
| C  | 2.70954363501311  | 0.16508886070998  | -1.76378725756277 |
| C  | 3.94898143083787  | -0.18915536793545 | -1.21471595278591 |
| C  | 4.05991198986414  | -0.42685084367132 | 0.15331827232499  |
| C  | 2.93284891682331  | -0.31868388789246 | 0.97974139526408  |
| C  | -1.39439300198108 | -2.07437675337684 | -1.22233897318072 |
| C  | -1.50595852628739 | -3.50215871757464 | -0.92925985764526 |
| C  | -1.55873190139691 | -4.46389296544417 | -1.93966686233900 |
| C  | -1.63135771131791 | -5.80828010180384 | -1.62685414641147 |
| C  | -1.66493071378191 | -6.23429059122218 | -0.30270292532273 |
| C  | -1.61395363654003 | -5.26986879345011 | 0.70619008884629  |
| C  | -1.53007673270833 | -3.92881902629727 | 0.40573648222217  |
| C  | -1.75411503465092 | -7.68703709325168 | 0.04555571658592  |
| C  | -0.04324399880751 | 3.77234394609923  | 0.63574276422686  |
| C  | 0.27374864558740  | 5.14915505520202  | 0.93757646118823  |

|   |                   |                   |                   |
|---|-------------------|-------------------|-------------------|
| H | -1.91490956264842 | -0.57966489010516 | -2.66003715920278 |
| H | -0.42942523385806 | -1.44483494952906 | -2.99815206060607 |
| H | -1.98437716370769 | -2.23056489871386 | -3.28628742093904 |
| H | -1.48516869033487 | -3.20246391462414 | 1.20529612212561  |
| H | -1.63676440689759 | -5.58056357973326 | 1.74329839371169  |
| H | -1.52752491211809 | -4.17811825024521 | -2.98153114876906 |
| H | -1.66302273435238 | -6.53842143886067 | -2.42520992837831 |
| H | -1.74892720920743 | -8.31899100956132 | -0.84050533225417 |
| H | -2.66894814891665 | -7.89834002127903 | 0.60107345862489  |
| H | -0.91822718564080 | -7.98919824963239 | 0.67775255793063  |
| H | 1.35145879597150  | 5.29526177461609  | 0.89949311820974  |
| H | -0.08531127019220 | 5.39835621708349  | 1.93415902760388  |
| H | -0.20208065198745 | 5.80529673878512  | 0.21112596349910  |

**HBpin**

|   |                   |                   |                   |
|---|-------------------|-------------------|-------------------|
| O | -3.80939113745227 | -3.99857346285660 | 0.57646955109246  |
| O | -1.79394675575067 | -2.95800502588033 | 0.73038776612347  |
| C | -2.81494800829394 | -5.70867251825211 | 1.91052393797869  |
| C | -3.23073898076148 | -6.07261380046281 | -0.51278674823981 |
| C | -1.25495731178235 | -4.11673609930333 | -1.28468164487951 |
| C | -0.26870176379482 | -4.82129589277709 | 0.88528269448606  |
| C | -2.82988675665893 | -5.04851779869759 | 0.53454020020301  |
| C | -1.51245837225230 | -4.26780034166774 | 0.21217998920290  |
| B | -3.14604054950661 | -2.83406850163743 | 0.80591598634214  |
| H | -3.69572443394290 | -1.80529500928407 | 1.04989428353418  |
| H | -2.46175135274705 | -6.83985070158492 | -0.61494745871863 |
| H | -4.15431290863305 | -6.57087698779420 | -0.21721666973875 |
| H | -3.39537151548669 | -5.62485152596453 | -1.49101495400694 |
| H | -3.81461492278628 | -6.07075272692848 | 2.15135924162508  |
| H | -2.13705294269268 | -6.56200211912635 | 1.93813104796469  |
| H | -2.51668497595430 | -5.01616935381549 | 2.69884138825263  |
| H | -0.07850885136816 | -5.84538856889231 | 0.56048070294512  |
| H | 0.60230944906996  | -4.22406228262147 | 0.61464787375158  |
| H | -0.34707046002450 | -4.81839235866285 | 1.97085564206757  |

|   |                   |                   |                   |
|---|-------------------|-------------------|-------------------|
| H | -0.43705760788016 | -3.41382529009952 | -1.44408163314574 |
| H | -0.97096957520099 | -5.06569532456467 | -1.74006046417603 |
| H | -2.12616243189982 | -3.73466670792605 | -1.81849430066416 |

***trans*-Ge(cat<sup>Br</sup>)<sub>2</sub>(HBpin)(ACN)**

|    |                   |                   |                   |
|----|-------------------|-------------------|-------------------|
| Br | -5.04065208855046 | 0.46204537039224  | 2.77041621533099  |
| Br | -7.05018199196681 | 0.39691746262264  | -2.57563567912485 |
| Br | 1.84630942830673  | -1.30077050946129 | 4.11343241751776  |
| Br | 5.39579683809438  | -2.59159540598614 | -0.17033077842048 |
| Br | 4.85075299390384  | -2.28549200360123 | 3.06720983332065  |
| Br | -3.99139644096648 | -0.42284384873464 | -3.61130101865269 |
| Br | -7.57827177745232 | 0.84506697569938  | 0.64897039302982  |
| Br | 2.92952013151631  | -1.90285934868201 | -2.29689267112781 |
| Ge | -1.04116455230169 | -0.69011096569826 | 0.24553352654762  |
| O  | -1.58551509891060 | -4.60418864230064 | 1.77859984119259  |
| O  | -1.45246219104359 | -2.73286739425079 | 0.50749574547947  |
| O  | -2.50124674117352 | -0.25687735023486 | 1.24960994273628  |
| O  | -2.09068018346344 | -0.58738152747064 | -1.24096024630638 |
| O  | 0.43552345103285  | -1.04071794826015 | -0.76571615223424 |
| O  | 0.01983540687950  | -0.79395977666738 | 1.72868801275750  |
| N  | -0.61256504658288 | 1.38861544086955  | 0.08203427859836  |
| C  | 0.29560278356239  | -5.25904420080023 | 0.45639569248753  |
| C  | -1.92747950636353 | -6.34798181978904 | 0.15356095096917  |
| C  | -3.15100818487679 | -3.87950950180659 | -0.76860629488465 |
| C  | -0.85350065081971 | -3.70422282197887 | -1.70655802594654 |
| C  | -1.21452914104595 | -5.04434319885647 | 0.45910316468578  |
| C  | -1.66535207222872 | -3.85748674049228 | -0.43994050688979 |
| C  | -3.56306043793679 | -0.08477726010910 | 0.46796994100226  |
| C  | -3.33817702088963 | -0.26469294612445 | -0.90324911846246 |
| C  | 1.24411411747247  | -1.19042616868397 | 1.39149322257654  |
| C  | 1.47387303678844  | -1.32434764729572 | 0.01539193213390  |
| C  | -4.37440207930303 | -0.12874244190333 | -1.80600683407591 |
| C  | -5.65462352183905 | 0.20648974321101  | -1.34581234260962 |
| C  | -5.87730341573241 | 0.393762455564106 | 0.01705025572202  |

|   |                   |                   |                   |
|---|-------------------|-------------------|-------------------|
| C | -4.82367165005188 | 0.24376940195742  | 0.92894326396323  |
| C | 2.70595886345954  | -1.74459185038512 | -0.44811060209306 |
| C | 3.72888992215193  | -2.03159233179582 | 0.46582871948046  |
| C | 3.49859122665639  | -1.90188926559433 | 1.83415134479153  |
| C | 2.24459260973931  | -1.48221660623344 | 2.29860841462034  |
| C | -0.40080284448814 | 2.50908165208119  | 0.03158244366044  |
| C | -0.13327690426202 | 3.92687458407701  | -0.03388719304379 |
| B | -1.61401376659071 | -3.26439314425461 | 1.80179513555838  |
| H | -1.77782156272510 | -2.61037041442939 | 2.77317462482940  |
| H | -1.74192125005240 | -6.65462309261962 | -0.87644497746819 |
| H | -1.55213191035933 | -7.13801172265053 | 0.80350204137201  |
| H | -3.00330432657925 | -6.27811999739663 | 0.30198365519362  |
| H | 0.56233718855920  | -5.95487089703548 | 1.25151064141719  |
| H | 0.63381377336754  | -5.68782584306288 | -0.48625068395026 |
| H | 0.85464546211136  | -4.33673264464314 | 0.62352068862327  |
| H | -0.98008209223036 | -4.61311945590488 | -2.29800152064814 |
| H | -1.20882523205669 | -2.87178749854594 | -2.31004822983516 |
| H | 0.20940969383623  | -3.57053722062948 | -1.52975376388644 |
| H | -3.44338530632217 | -2.95782038369161 | -1.26767613683872 |
| H | -3.37226684182177 | -4.69599967857553 | -1.45500308359749 |
| H | -3.78164682225131 | -4.00339335748682 | 0.11254773703845  |
| H | -0.17775716422103 | 4.26251269461946  | -1.06815019526123 |
| H | 0.85729629246739  | 4.13307412892395  | 0.36699263455156  |
| H | -0.87512596484621 | 4.46788787622846  | 0.55041204636981  |



## References

1. A. L. Liberman-Martin, R. G. Bergman, T. D. Tilley, *J. Am. Chem. Soc.* 2015, **137**, 5328-5331.
2. D. Roth, H. Wadepohl, L. Greb, *Angew. Chem. Int. Ed.* 2020, **59**, 20930-20934.
3. L. D. Field, B. A. Messerle, M. Rehr, L. P. Soler, T. W. Hambley, *Organometallics* 2003, **22**, 2387-2395.
4. E. Vasilikogiannaki, I. Titilas, C. Gryparis, A. Louka, I. N. Lykakis, M. Stratakis, *Tetrahedron* 2014, **70**, 6106-6113.
5. J. W. Wackerly, J. F. Dunne, *J. Chem. Educ.* 2017, **94**, 1790-1793.
6. C. Peppe, E. S. Lang, F. Molinos de Andrade, L. Borges de Castro, *Synlett* 2004, **10**, 1723-1726.
7. S. Matsumo, T. Oseki, M. Akazome, Y. Otani, *ACS Omega* 2018, **3**, 17928-17935.
8. A. Sen, T. Lai, R.R. Thomas, *J. Orgmet. Chem.* 1988, **358**, 567-588.
9. J. Liu, C. Wu, T. Hu, W. Yang, Y. Xie, Y. Shi, Q. Liu, Y. Shao, F. Zhang, *J. Org. Chem.* 2022, **87**, 3442-3452.
- <sup>10</sup> M. Fleige, J. Mobus, T. vom Stein, F. Glorius, D. W. Stephan, *Chem. Commun.*, 2016, **52**, 10830-10833
- <sup>11</sup> Khalimon, A. Y.; Farha, P.; Kuzmina, L. G.; Nikonov, G. I. *Chem. Commun.* 2012, **48**, 455-457.
- <sup>12</sup> C. N. Garon, D. I. McIsaac, C. M. Vogels, A. Decken, I. D. Williams, C. Kleeberg, T. B. Marder, S. A. Westcott, *Dalton Trans.*, 2009, 1624-1631.

13. V. Lillo, J. A. Mata, A. M. Segerra, E. Peris, E. Fernandez, *Chem Commun.* 2007, 2184-2186.

<sup>14</sup> a) Zhu, W.; Sun, Q.; Wang, Y.; Yuan, D.; Yao, Y. *Org. Lett.* 2018, 20, 3101-3104; b) Chao, M. R.; Li, W. M.; Zhu, L. L.; Ma, H. H.; Wang, X. B. *Chemical Papers* 2015, 69, 1004-1011.

<sup>15</sup> Garon, C. N.; McIsaac, D. I., Vogels, C. M.; Decken, A.; Williams, I. D.; Kleeberg, C.; Marder, T. B.; Westcott, S. A. *Dalton Trans.* 2009, 1624-1631.

<sup>16</sup> Sun, H. B.; Li, B.; Hua, R.; Yin, Y. *Eur. J. Org. Chem.* 2006, 4231-4236
